1 **ARPC5 Isoforms Drive Distinct Arp2/3-dependant Actin Remodeling Events in CD4 T**  
2 **Cells**

3

4

5 **Lopamudra Sadhu<sup>1</sup>, Nikolaos Tsopoulidis<sup>1,3</sup>, Vibor Laketa<sup>2</sup>, Michael Way<sup>4,5</sup>**

6 **and Oliver T. Fackler<sup>1</sup>**

7

8 <sup>1</sup> Department of Infectious Diseases, Integrative Virology, University Hospital Heidelberg,  
9 Heidelberg, Germany

10 <sup>2</sup> Department of Infectious Diseases, Virology, University Hospital Heidelberg, Germany

11 <sup>3</sup> current address: Center for Regenerative Medicine, Mass General Hospital, Harvard Medical  
12 School, Boston, MA, USA

13 <sup>4</sup> Cellular Signaling and Cytoskeletal Function Laboratory, The Francis Crick Institute,  
14 London, UK

15 <sup>5</sup> Department of Infectious Disease, Imperial College, London, UK

16

17

18

19

20

21 Running title: ARPC5 isoform-specific actin dynamics in CD4 T cells

22

23

24 # Corresponding author at:

25 Department of Infectious Diseases, Integrative Virology, University Hospital Heidelberg, Im

26 Neuenheimer Feld 344, 69120 Heidelberg, Germany Phone: ++49-(0)6221-561322; Fax:

27 ++49-(0)6221-565003; Email: [oliver.fackler@med.uni-heidelberg.de](mailto:oliver.fackler@med.uni-heidelberg.de)

28

## 29 **Summary**

30 Nuclear actin polymerization is observed in an increasing number of biological processes  
31 including DNA replication stress [1-6] and T cell receptor (TCR) signaling in CD4 T cells [7].  
32 TCR activation induces the formation of F-actin in the cytoplasm and the nucleus to  
33 strengthen contacts to antigen presenting cells and drive a gene expression program to shape  
34 humoral immune responses, respectively [7-11]. Interestingly, these two actin remodeling  
35 events are phenotypically different and appear to be mechanistically uncoupled from each  
36 other but both involve actin polymerization by the Arp2/3 complex. The Arp2/3-complex  
37 consists of 7 subunits where ARP3, ARPC1 and ARPC5 exist as two different isoforms in  
38 humans that can assemble in complexes with different properties [12-17]. Here we examined  
39 whether specific Arp2/3 subunit isoforms are responsible for distinct actin remodeling events  
40 in CD4 T cells. Transient silencing or knock out of individual subunit isoforms demonstrates  
41 that in response to TCR signaling, the ARPC5L isoform is involved in nuclear actin  
42 polymerization, while cytoplasmic actin dynamics selectively relies on ARPC5. In contrast,  
43 nuclear actin polymerization triggered by DNA replication stress in CD4 T cells required  
44 ARPC5 and was independent of ARPC5L. Moreover, nuclear  $Ca^{2+}$  transients, which are  
45 essential for TCR-induced nuclear actin polymerization, were dispensable for nuclear actin  
46 filament formation during DNA replication stress. Our results reveal that the selective  
47 involvement of ARPC5 isoforms governs the activity of Arp2/3 complex in distinct actin  
48 polymerization events and imply nuclear  $Ca^{2+}$  transients as selective trigger for ARPC5L-  
49 dependent nuclear actin polymerization.

50

51 **Keywords:** Nuclear F-actin, Arp2/3 complex, CD4 T cell activation, DNA replication stress

52

## 53 **Results and discussion**

54 To assess the involvement of Arp2/3 complex in cytoplasmic and nuclear actin dynamics, we  
55 performed *in vitro* high-speed confocal cell imaging of Jurkat CD4 T cells stably expressing a  
56 nuclear lifeact-GFP reporter (JNLA) after plating the cells on dishes coated with anti-CD3  
57 and anti-CD28 antibodies [7] (Fig. 1A). In DMSO treated control cells, TCR engagement  
58 rapidly induced a transient burst of a nuclear F-actin (NFA) meshwork, which was followed  
59 by cell spreading and actin polymerization into a circumferential F-actin ring (AR) at the cell  
60 periphery (Fig. 1B-D, Suppl. Video 1). Pretreating the cells with the Arp2/3 inhibitor CK-869  
61 prevented the formation of both NFA and AR with comparable efficacy (Figs.1B-D, Suppl.  
62 Video 2). Arp2/3 complex dependent actin polymerization in the nucleus and at the cell-cell  
63 contacts was also observed in the context of an immune synapse between JNLA cells with  
64 Staphylococcus enterotoxin E (SEE) superantigen loaded Raji B cells (Fig 1E-H, Suppl.  
65 Videos 3, 4). In line with our previous findings [7], these results establish that the Arp2/3-  
66 complex mediates similar, dynamically and phenotypically discernable, cytoplasmic and  
67 nuclear actin polymerization in CD4 T cells in response to T cell activation.

68

69 Nuclear but not cytoplasmic actin polymerization in response to T cell activation depends on  
70 nuclear  $\text{Ca}^{2+}$  transients and activation of nuclear ARP2. Both processes are thus regulated by  
71 distinct mechanisms and occur independently of another [7]. In search for the molecular basis  
72 for this differential regulation of Arp2/3 complex, we hypothesized that nuclear and  
73 cytoplasmic actin polymerization involves distinct Arp2/3-complex subunit isoforms [12-17].  
74 Analyzing the mRNA and protein expression profile of Arp2/3 subunit isoforms in Jurkat  
75 CD4 T cells and primary human CD4 T cells revealed the ARPC1A and ARPC5 isoforms that  
76 were previously identified in mouse fibroblasts are also expressed in human CD4 T cells (Fig.  
77 1I, Fig. S1). TCR stimulation in primary CD4 T cells increased mRNA levels of all subunits

78 and all subunits and isoforms were readily detected by western blotting for both, resting (R)  
79 and activated (A) CD4 T cells.

80

81 To assess the role of Arp2/3 subunit isoforms in these actin polymerization events, we  
82 transduced bulk JNLA cultures with isoform-specific shRNAs to reduce the expression of  
83 ARPC1A, ARPC1B, ARPC5 or ARPC5L (Fig. 2A). Unlike direct TCR stimulation, where  
84 Arp2/3-complexes are activated at the plasma membrane as well as in the nucleus,  
85 PMA/Ionomycin (P/I) increases intracellular  $Ca^{2+}$  and only triggers nuclear actin  
86 polymerization [7]. Selective silencing of ARPC1A, ARPC1B or ARPC5 did not significantly  
87 reduce the frequency of cells with NFA. In contrast, JNLA cells with reduced ARPC5L levels  
88 were significantly impaired in NFA formation in response to P/I (Figs. 2B, C). As with NFA,  
89 ARPC1A or ARPC1B were both able to support the formation of cytoplasmic AR after  
90 surface mediated TCR stimulation (Figs. 2D-E, see Figs. S2A for a lower magnification  
91 overview and Figs. S2B-D for quantification of cell morphologies). Importantly, ARPC5 but  
92 not ARPC5L was required for efficient cytoplasmic AR assembly. Also, upon surface  
93 mediated TCR stimulation of JNLA cells, ARPC5L mediated the formation of NFA (Figs.  
94 S2E, F).

95

96 Our observations pointed to a central role for ARPC5 and ARPC5L in the specificity of  
97 Arp2/3 driven cytoplasmic and nuclear actin polymerization in response to CD4 T cell  
98 activation. To confirm and/or extend our observations with transient silencing, we generated  
99 ARPC5 or ARPC5L knock out (KO) cell lines by CRISPR-Cas9 ribonucleoprotein  
100 transfection (Fig. 3). ARPC5 or ARPC5L were both virtually undetectable in the resulting  
101 bulk KO cultures (Fig. S3A). The levels of other Arp2/3 subunits remained largely unaffected  
102 with the exception of ARPC1B that was expressed to lower levels compared to the non-  
103 targeting control (NTC) (Figure S3A). The nucleofection and transduction procedures used to

104 generate and study these KO cells slightly reduced the overall efficiency of NFA formation in  
105 response to T cell activation. Nevertheless, T cell stimulation confirmed that ARPC5 is  
106 selectively required for cytoplasmic actin polymerization and is not substituted by the  
107 elevated levels of ARPC5L. In turn, ARPC5L is essential for NFA formation and dispensable  
108 for cytoplasmic actin polymerization (Fig. 3A-B, see mCherry controls). These effects were  
109 not due to off target effects as reintroduction of the respective mCherry tagged ARPC5  
110 isoform in these KO cells reconstituted their ability to form NFA or ARs (Fig. 3A-B; S3B-C).  
111  
112 Actin polymerization at sites of TCR engagement is directly coupled to downstream  
113 signalling constituted by dynamic phosphorylation cascades occurring in induced signalling  
114 platforms referred to as microclusters [18-22]. Nuclear actin dynamics precedes cytoplasmic  
115 actin polymerization upon TCR stimulation but whether NFA formation affects microcluster  
116 formation or function is unclear. We therefore tested whether ARPC5 isoforms differently  
117 impact generation and composition of these microclusters. Disruption of cytoplasmic actin  
118 polymerization upon KO of ARPC5 significantly reduced the number of signalling  
119 microclusters as well as the amount of tyrosine phosphorylation (pTyr) or phosphor -SLP-76  
120 (pSLP-76) within the microclusters (Fig. S4A-C and S4D-F). In contrast, loss of ARPC5L  
121 had no obvious effect on the formation and composition of TCR signaling induced  
122 microclusters. Together, these results revealed that in response to CD4 T cell activation,  
123 ARPC5 and ARPC5L selectively mediate actin polymerization at the plasma membrane  
124 including TCR proximal signaling or actin dynamics in the nucleus, respectively.

125  
126 We next assessed whether the differential effect of ARPC5 and ARPC5L reflects their distinct  
127 cellular distribution. Since antibody staining did not allow to distinguish between the  
128 distribution of endogenous ARPC5 and ARPC5L, we examined the localization of transiently  
129 expressed the mCherry tagged isoforms that functionally rescued our KO cell lines. Both,

130 mCherry tagged ARPC5 and ARPC5L had a diffuse cytoplasmic distribution but were also  
131 detected in larger aggregates/punctae in the cytoplasm and the nucleus (Fig. 3C). Consistent  
132 with this, immunoblot analysis of nucleo-cytoplasmic fractionations reveals that endogenous  
133 ARPC5 and ARPC5L are both present in the nucleus, albeit at lower levels than the  
134 cytoplasm (Fig. S4G). This distribution of ARPC5 and ARPC5L was unaffected by the loss of  
135 expression of the other ARPC5 isoform. To better assess the localization of ARPC5.mCherry  
136 and ARPC5L.mCherry relative to the NFA network, we applied two-color super resolution  
137 STED microscopy on P/I-stimulated A301 CD4 T cells, which are best suited to visualize  
138 endogenous NFA meshworks in T cells and in which NFA formation depends on nuclear  
139 Arp2/3 complex induced by  $Ca^{2+}$  signaling [7]. Deconvolved and segmented STED images  
140 revealed a complex NFA meshwork (Fig. 3D). ARPC5.mCherry and ARPC5L.mCherry were  
141 both detected in discrete spots within the nucleus and approx. 10% of these spots co-localized  
142 with nuclear actin filaments, however, no significant difference was observed between both  
143 isoforms (9.9% for ARPC5, 13.2% for ARPC5L, see also Fig. S4H). The identity of the  
144 ARPC5 isoform involved therefore does not determine the ability of Arp2/3 complexes to  
145 associate with actin filaments in the nucleus.

146

147 We next sought to test whether the selective involvement of ARPC5L is a common principle  
148 for Arp2/3-dependent nuclear actin polymerization events. Arp2/3 also mediates nuclear actin  
149 polymerization in response to DNA replication stress induced by the DNA polymerase  
150 inhibitor Aphidicolin (APH) [4]. Similar to the results obtained by Lamm et al. (2020) in  
151 fibroblasts and epithelial cells, APH treatment of JNLA cells induced DNA replication stress  
152 as indicated by phosphorylation of the checkpoint kinase CHK-1 (Fig. S5A) and the  
153 formation of a NFA network that is maximal approx. at 90 min post treatment (Fig. 4D, see  
154 Fig. S5B for tracks of individual cells). This NFA meshwork appeared to consist of fewer but  
155 thicker F-actin bundles and to disassemble more slowly than when induced by TCR activation

156 (Fig. 4B, C). Next, ARPC5L and ARPC5 KO cells were stimulated in parallel by TCR  
157 engagement or APH. For TCR activation, this confirmed the requirement of ARPC5 for  
158 formation of actin ring (AR) and ARPC5L for the NFA network (Fig. S5C). In contrast, NFA  
159 formation in response to APH was indistinguishable to control cells in ARPC5L KO cells  
160 formed that (Figs 4B, C) but significantly impaired in ARPC5 KO cells. NFA induction by T  
161 cell activation or DNA replication stress is thus mediated by specific Arp2/3 complexes  
162 containing distinct ARPC5 subunit isoforms but nuclear localization of the actin  
163 polymerization event does not govern the involvement of the ARPC5 or ARPC5L isoforms.  
164 We therefore tested if this specificity for ARPC5 isoforms is provided by upstream signaling.  
165 NFA formation induced by T cell activation is mediated by nuclear calcium transients and can  
166 be inhibited by interfering with nuclear calmodulin by expressing a dominant negative version  
167 of calmodulin binding protein 4 (CAMBP4) [7, 23] (Fig. 4E, F). In contrast, dominant  
168 negative CAMBP4 did not affect NFA formation or CHK-1 phosphorylation upon APH  
169 treatment of JNLA cells (Fig. 4E-F and S5A). Similarly, pharmacological inhibitors of  
170 downstream effectors of calmodulin including Calmodulin-kinase kinase inhibitor STO609 as  
171 well as the Calmodulin-kinase II inhibitors KN93 and KN62 did not prevent NFA induction  
172 by APH (Fig. S5D). These results suggest nuclear  $Ca^{2+}$ -calmodulin acts as the selective  
173 trigger for ARPC5L-dependent nuclear actin polymerization.

174

175 A main finding of our study is that nuclear and cytoplasmic actin polymerization triggered by  
176 TCR engagement is specifically mediated by Arp2/3 complexes containing ARPC5L or  
177 ARPC5, respectively. The comparison of TCR signaling and APH-mediated induction of  
178 DNA replication stress revealed that nuclear actin polymerization events induced by these  
179 different stimuli are mediated by Arp2/3 complexes with distinct ARPC5 subunit preferences.  
180 Since Arp2/3 complexes containing both isoforms are present and operational in the nucleus,  
181 the selectivity for an ARPC5 isoform is not determined at the level of subcellular distribution.

182 Rather, the nature of the stimulus appears critical for the selective induction of actin  
183 polymerization by ARPC5 or ARPC5L containing Arp2/3 complexes (see schematic model in  
184 Fig. 4G) and our results suggest nuclear calcium-calmodulin signaling as specific trigger of  
185 ARPC5L containing complexes. It will be interesting to determine whether induction of  
186 ARPC5L-containing complexes by calcium-calmodulin can also occur in the cytoplasm. As  
187 described for N-Wasp [24-26], nucleation promoting factors (NPFs) that stimulate Arp2/3 can  
188 be activated by calcium-calmodulin. This suggests that ARPC5L containing complexes may  
189 contain specific NPFs that are subject to direct or indirect activation by calcium-calmodulin.  
190 In contrast, Arp2/3 complexes containing ARPC5 such as those involved in DNA replication  
191 stress trigger nuclear actin polymerization independently of calcium-calmodulin. It is  
192 tempting to speculate that the responsiveness to nuclear calcium transients by ARPC5L  
193 containing Arp2/3 complexes reflects the requirement for rapid conversion of an extracellular  
194 signal, e.g., to elicit a transcriptional response. In contrast, DNA replication stress provides a  
195 signal from within the nucleus without the need for a fast second messenger. Notably TCR  
196 signaling or DNA replication stress induce NFA networks of different filament morphology  
197 and dynamics. These architectural differences may translate into distinct functional roles of  
198 thin/dynamic filaments in transcriptional regulation following TCR engagement and thicker  
199 and more stable filaments that exert mechanical functions during DNA repair. The preference  
200 for distinct ARPC5 isoforms may adjust the activity of Arp2/3 complex to such divergent  
201 actin polymerization events. Defining the molecular basis of the selectivity of ARPC5 or  
202 ARPC5L-containing Arp2/3 complexes for their respective stimulus and how the architecture  
203 of NFA is tailored to specific functions will be an important goal of future studies.

204

205

206

207





## 209 **Acknowledgments**

210 We are grateful to Nadine Tibroni and Ina Ambiel for technical assistance and Kathrin Bajak  
211 for help with manuscript preparation and submission. This project is supported by the  
212 Deutsche Forschungsgemeinschaft (DFG, German Research Foundation) by project FA  
213 378/20-1 to OTF. MW was supported by Cancer Research UK (FC001209), the UK Medical  
214 Research Council (FC001209), and the Wellcome Trust (FC001209) funding at the Francis  
215 Crick Institute as well as by the European Research Council (ERC) under the European  
216 Union's Horizon 2020 research and innovation programme (grant agreement No 810207 to  
217 MW). For the purpose of Open Access, the author has applied a CC BY public copyright  
218 licence to any Author Accepted Manuscript version arising from this submission.

219

220

## 221 **Author contributions**

222 Conceptualization, O.T.F., N.T., Methodology, L.S., N.T., V.L.; Investigation, L.S., N.T.,  
223 V.L.; Data analysis, L.S., N.T., V.L.; Writing – Original Draft, O.T.F., L.S.; Writing –  
224 Review & Editing, O.T.F, M.W., L.S., N.T., V.L.; Funding Acquisition, O.T.F.; Resources,  
225 M.W; Supervision, O.T.F

226

227

## 228 **Declaration of interest**

229 The authors declare no competing interests.

230

231

232

233 **Figure Legends**

234 **Fig. 1. Arp2/3 complex mediated nuclear and plasma membrane actin polymerization in CD4 T**  
235 **cells. (A)** Schematic representation of the experimental/live cell imaging set up as performed for  
236 figures B-D. **(B)** Jurkat CD4 T cells stably expressing nuclear lifeact-GFP (here on referred to as  
237 JNLA.GFP), pre-treated with either DMSO (solvent control) or CK869 for 30min, were put on TCR  
238 stimulatory GBDs and subjected to live-cell microscopy. Shown are representative still images from  
239 the spinning-disk confocal microscope from the time the cells fall on the coverslips until after contact  
240 with the stimulatory surface, with acquisition every 30s. Arrows indicate the nuclear F-actin (NFA)  
241 whereas arrowheads point to the F-actin at PM. Quantification of nuclear **(C: nuclear actin filaments**  
242 **[NFA])** and plasma membrane **(D: F-actin ring [AR])** polymerization are shown, respectively, upon  
243 contact with TCR stimulatory surface. Data points indicate mean values from three independent  
244 experiments where 40-60 cells were analyzed per condition in each experiment. Scale bar, 5 $\mu$ m. **(E)**  
245 Schematic representation of the experimental/live cell imaging set up as performed for F-H. **(F)**  
246 Shown are representative still images at indicated time points from live-cell visualization of nuclear  
247 and plasma membrane actin dynamics in JNLA.GFP cells treated as above with either DMSO or  
248 CK869 upon contact with SEE pulsed Raji B cells. Images were acquired every 70s for a total of  
249 30min after adding the Raji B cells. Quantification of nuclear **(G, NFA)** and plasma membrane **(H,**  
250 **AR)** F-actin dynamics of JNLA.GFP cells upon contact with SEE pulsed Raji B cells are shown  
251 respectively. All data points indicate mean values from three independent experiments with at least 40  
252 cells analyzed per condition per experiment. Statistical significance based on the calculation of mean  
253  $\pm$  SD from three independent experiments, using Welch's t-test were performed. \* $P \leq 0.0332$ , \*\* $P \leq$   
254  $0.0021$  and *ns*: not significant. Scale bar, 7 $\mu$ m. **(I)** Expression of all the subunits of the Arp2/3 complex  
255 along with the isoforms of ARPC1 and ARPC5 across Jurkat cell line and primary human CD4 T cells  
256 from two representative healthy donors were verified using Western blotting. Representative  
257 immunoblots compare the protein levels of each subunit and their isoforms in CD4 T cells. Additional  
258 comparisons for expression of these proteins in Resting (R) and Activated (A) CD4 T cells from  
259 Donor 4 and 5 are shown, respectively. Black arrowheads indicate the specific bands, black asterisks  
260 mark unspecific bands. Note that the ARPC5L antibody also detects ARPC5 (marked by red asterisk).

261 **Fig. 2. ARPC5 isoforms differentially regulate nuclear and plasma membrane actin**  
262 **polymerization.** (A) Representative immunoblots show knockdown of ARPC1 and ARPC5 isoforms  
263 in JNLA.GFP cells treated with indicated shRNA. Black arrowheads indicate the specific bands, black  
264 asterisks mark unspecific bands. Note that the ARPC5L antibody also detects ARPC5 (marked by red  
265 asterisk). (B) Representative spinning disk confocal still images of JNLA.GFP cells treated with  
266 indicated shRNA, show post activation with P/I. Arrows point to the nuclear F-actin (NFA). (C)  
267 Quantification of NFA formation in shRNA treated cells relative to the scrambled control treated cells.  
268 Error bars were calculated from mean $\pm$ SD of 4 independent experiments where 30 cells were  
269 analyzed per condition per experiment. Each dot represents mean of each independent experiment. (D)  
270 Representative single plane immunofluorescence images of Phalloidin-488 stained F-actin ring (AR)  
271 formation in JNLA.GFP cells treated with indicated shRNA upon activation on coverslips coated with  
272 antiCD3+CD28 antibodies. Arrowheads point to the f-actin ring at the PM. (E) Quantification of  
273 Phalloidin stained F-actin ring (AR) formation in shRNA treated cells relative to the control treated  
274 cells. Error bars were calculated from mean $\pm$ SD of four independent experiments where at least 100  
275 cells were analyzed per condition per experiment. Each dot represents mean of each independent  
276 experiment. One sample t-test was used to determine statistical significances, where  $***P \leq 0.0002$   
277 and *ns*: not significant. Scale bar, 5 $\mu$ m.

278

279 **Fig. 3. Effects observed on nuclear and plasma membrane F-actin dynamics upon ARPC5/C5L**  
280 **knockout can be rescued by overexpression of the respective ARPC5 isoforms.**

281 (A) Shown are representative confocal still images of the indicated KO JNLA.GFP cells  
282 overexpressing mCherry (control) or mCherry fusion proteins of an ARPC5 isoforms, post activation  
283 with either anti CD3+CD28 antibodies (top panel) or with P/I (bottom panel). Arrows point to the  
284 nuclear F-actin (NFA, bottom). Arrowheads point to the F-actin ring (top). Scale bar, 7 $\mu$ m. (B)  
285 Quantification of AR formation in the PM, stained with Phalloidin is compared to the NFA formation  
286 visualized with NLA-GFP in the indicated KO or KO+ARPC5 isoform expressing cells was  
287 performed relative to the non-targeting control (NTC) treated cells. 'mCherry' alone was used as  
288 vector backbone control for the overexpression study. Bars indicate mean from one independent

289 experiment where 30-50 cells were analyzed per condition. **(C)** Shown are representative spinning  
290 disk confocal images of ARPC5.mCherry and ARPC5L.mCherry distribution in non-activated JNLA  
291 cells. White arrows point to the respective C5 or C5L punctae in the nucleus. **(D)** Representative,  
292 deconvoluted and segmented Stimulated emission depletion (STED) images show endogenous nuclear  
293 actin filaments (stained with Phalloidin-647N) and ARPC5.mCherry/ARPC5L.mCherry (stained in  
294 atto-594 channel) in A3.01 T cells, stimulated with P/I for 30s. MCherry fluorescence was enhanced  
295 by staining with an anti-mCherry antibody followed by an Atto-568 coupled secondary antibody.  
296 Arrows (in white) point to the colocalization events. Percent colocalization is mentioned as mean  $\pm$  SD  
297 (in cyan) for each of the isoforms. Scale bar, 500nm.

298

299 **Fig. 4. Differential role of ARPC5 isoforms in replication stress mediated NFA formation (A)**

300 Schematic of KO generation and induction of replication stress in the JNLA KO cells using  
301 Aphidicolin (APH). **(B)** Shown are representative spinning disk confocal still images of the APH pre-  
302 treated KO or control cells. The movies were acquired for 5h with acquisition every 15min post pre-  
303 treatment of cells with APH. The stills at the indicated timepoints are representative of the timepoint  
304 where the NFA burst has been observed in each condition. **(C)** Quantification of the % of cells with  
305 NFA bursts (first 2h of imaging) post replication stress induction in control and KO cells are shown  
306 where the bars represent mean values from three independent experiments. Around 40-60  
307 cells/condition/experiment were analyzed. Statistical significance was calculated using One-way  
308 ANOVA (multiple comparison) **(D)** stacked bar graph (denoted by three different colors) shows the  
309 maximum NFA burst within the first 2h of the entire 5h of live cell imaging duration. **(E)** JNLA cells  
310 transduced with either mCherry (control) or CAMBP4.NLS-mCherry were pre-treated with solvent  
311 control (DMSO), activated by PMA+Ionomycin (P/I) or replication stress induction by APH for 3h  
312 prior to live cell imaging. Shown are representative spinning disk confocal still images (within the first  
313 2h of imaging) of the DMSO control vs either P/I or APH mediated NFA bursts (white arrows) in the  
314 presence and absence of nuclear Calmodulin. Movies for visualizing replication stress were acquired  
315 for 5h with acquisition every 15min post pre-treatment of cells. Whereas movies for visualizing P/I  
316 activation induced NFA were acquired for 5mins with acquisition every 15-30s. **(F)** Quantification of

317 the NFA bursts in the above-mentioned conditions were performed. Shown here are the bars  
318 representing mean values from three independent experiments, where at least 30 cells were analyzed  
319 per condition per experiment for NFA quantification. Statistical significance was calculated using  
320 Welch's t-test.  $*P \leq 0.0332$ ,  $**P \leq 0.0021$ ,  $***P \leq 0.0002$  and ns: not significant. Scale bar,  $7\mu\text{m}$ .

321 **(G)** Schematic model for the regulation of actin dynamics induced upon TCR engagement (left) or  
322 induction of DNA replication stress by aphidicolin (APH) (right). See text for details.

323

324

325

326 **STAR Methods**

327

328 **Cells and reagents**

329 HEK 293T cells were cultured in DMEM high glucose plus 10% feline bovine serum (FBS,  
330 Milipore), 100U/mL penicillin and 100µg/mL streptomycin. Primary T cells, Jurkat Tag cells  
331 (JTAGs) and CLEM derived A3.01 cells were cultured in RPMI containing 10% FBS and 1%  
332 Penicillin-streptomycin and GlutaMAX-I (Gibco). All experiments performed in JTag cells  
333 stably expressing nuclear lifeact-GFP (JNLA) were obtained as described previously in [7].  
334 All Cell lines were cultivated according to their ATCC (<https://www.atcc.org>) guidelines. For  
335 visualization of nuclear F-actin, A3.01 or JNLA were washed thoroughly with PBS, adjusted  
336 to a cell density of 3E5/ml, and incubated overnight in RPMI (phenol-Red free medium,  
337 GIBCO) containing 0.5% (A3.01) or 10% (JNLA) FBS. For Immunofluorescence (IF)  
338 microscopy: F-actin was stained with Phalloidin Alexa Fluor 488 or atto-AF488 (Thermo  
339 Fischer). Alexa antibodies for IF such as: goat anti-mouse Alexa Fluor 568, goat anti-rabbit  
340 Alexa Fluor 647 and goat anti-rabbit Alexa Fluor 568 were obtained from Thermo Fischer  
341 Scientific. The following anti-CD3 (clone HIT3a against CD3ε; BD Pharmingen) and mouse  
342 anti-CD28 (CD28.2, BD Pharmingen) were used at 1:100 dilution for coating  
343 coverslips/GBDs to make stimulatory surface for T cell activation. Other antibodies used were  
344 mouse-anti-ARP3, 1:10,000 (cloneFMS338, SIGMA), mouse-anti-GAPDH, 1:2500 (G9,  
345 Santa Cruz), mouse anti- p16-ARC, 1:500 (#305011, Synaptic systems & sc-166760, SCBT),  
346 rabbit anti-ARPC5L, 1:1000 (GTX120725 GeneTex and 22025-1-AP Proteintech), rabbit  
347 anti-ARPC1A, 1:500 (#HPA004334, Sigma), mouse anti-ARPC1B, 1:500 (SCBT), rabbit  
348 anti-ARPC2, 1:1000 (EPR8533 Abcam), mouse anti-ARPC3, 1:500 (#HPA006550, Sigma  
349 Aldrich), mouse anti-ARPC4, 1:500 (#NBP1-69003, Novus Biologicals), mouse anti-  
350 mCherry, 1:1000 for WB and 1:500 for IF (NBP1-96752), rabbit anti-mCherry, 1:1000 for

351 WB and 1:500 for IF (ab167453), rabbit anti-pTyr, 1:100 (#sc18182, SCBT), rabbit anti-  
352 pSLP76, 1:1000 (#ab75829, Abcam), HRP-coupled secondary rabbit or mouse antibodies for  
353 immunoblotting were obtained from Jackson Immuno Research was used at a dilution of  
354 1:5000 for all samples. The secondary Alexa fluorescent coupled antibodies (either mouse or  
355 rabbit) used for IF staining were obtained from Invitrogen and used at a dilution of 1:1000.  
356 For live cell imaging and STED microscopy: glass- bottom-dishes (GBD) with 35 mm plate  
357 diameter, 14 mm glass diameter, thickness 1.5 (Mattek corporation) and  $\mu$ -slide 8-well glass  
358 bottom chambers (Ibidi) were used along with poly-lysine (Sigma), coated at a concentration  
359 of 0.01% in sterile filtered water. Phalloidin atto-647N used for STED imaging was bought  
360 from ATTO-TEC GmbH (AD 647N-81).

361

#### 362 **Preparation of primary CD4 T cells**

363 For the isolation of primary human CD4 T cells, human Buffy Coats from anonymous healthy  
364 donors were obtained from the Heidelberg University Hospital Blood Bank. CD4+ T cells  
365 were isolated by negative selection with the RosetteSep™ Human CD4+ T Cell Enrichment  
366 Cocktail and separated by Ficoll gradient centrifugation, resulting in homogenous populations  
367 of CD4+ T cells with a purity of 90-95% as assured by flow cytometry. Cells labelled as  
368 ‘Resting’ were cultured for 72h in complete RPMI media containing recombinant human IL2  
369 (Biomol #155400.10) at 10ng/ml final concentration. Whereas the cells labelled as  
370 ‘Activated’ were cultured for 72h in complete RPMI media containing recombinant human  
371 IL2 (Biomol #155400.10) at 10ng/ml final concentration along with dynabeads at a ratio of  
372 25 $\mu$ l Dynabeads/10 million cells (#11132D, Gibco).

373

#### 374 **Agonists and inhibitors**



375 The following chemicals were used at the indicated concentrations: Ionomycin (Iono, 2 $\mu$ M),  
376 Phorbol 12-myristate 13-acetate (PMA, 162 nM), CK-869 (100  $\mu$ M), KN-93 (0.25  $\mu$ M), KN-  
377 62 (2.5  $\mu$ M), STO-609 (5 $\mu$ M) and Aphidicolin (15 $\mu$ M), all obtained from Sigma Aldrich.

378

### 379 **Expression plasmids**

380 pLVX vector expressing either human ARPC5/C5L cDNA fused to a mCherry fluorescent  
381 reporter or just the mCherry alone, were a kind gift from the lab of M.Way, generated as  
382 described in [14]. Plasmids expressing mCherry alone or mCherry conjugated to CAMBP4 in  
383 the pWPI backbone were used as described in Tsopoulidis et al and were selected using  
384 blasticidin (5 $\mu$ g/ml). For the stable expression of shRNAs, gene specific target sequences  
385 (available upon request) were cloned into the lentiviral Vector pLKO.1-puro (Addgene) as  
386 described in [7].

387

### 388 **Live-cell imaging of actin dynamics**

389 Live imaging of actin dynamics was performed with a Nikon Ti PerkinElmer UltraVIEW  
390 VoX spinning disc confocal microscope equipped with a perfect focus system (PFS), a 60X  
391 oil objective (numerical aperture, 1.49), Hamamatsu ORCA-flash 4.0 scientific  
392 complementary metal-oxide semiconductor camera, and an environmental control chamber  
393 (37°C, 5% CO<sub>2</sub>), as described earlier in [7]. Acquisition settings varied depending on the total  
394 acquisition time required for each experimental question/setup. The following are the  
395 acquisition settings for short term imaging: exposure time, 300 ms; frame rate, 6 to 10  
396 frames/s, number of Z planes, 10; Z-stack spacing, 0.5 $\mu$ m; 488 nm, laser power between 4.5-  
397 5.5%; and total acquisition time, 3 to 10 min. Jurkat cells stably expressing nuclear  
398 lifeact.GFP (JNLA) were always washed with PBS and split 24 hours before the experiment  
399 to a density of 3 $\times$ 10<sup>5</sup>/ml. The next day, 3 $\times$ 10<sup>5</sup> cells were harvested, washed with PBS, and  
400 resuspended in 100 $\mu$ l reconstituted RPMI containing 10% FCS. For imaging the actin

401 dynamics of JNLA cells falling on stimulatory surface (coated with anti-CD3+CD28  
402 antibodies), the PFS system was adjusted first with a low amount of highly diluted cells  
403 placed on the coated glass bottom dish. A single cell was centered to the field of view, and the  
404 PFS was adjusted to automatically focus on the glass-cell contact site. Subsequently, the stage  
405 was moved to a cell-free area, and 100 $\mu$ l of the cell suspension ( $3 \times 10^5/100\mu$ l) was added to  
406 the glass bottom dish with simultaneously recording cells while making contact with the glass  
407 surface.

408 For imaging of actin dynamics in cells resting on the glass surface, 100 $\mu$ l of cells ( $3 \times 10^5/ml$ )  
409 was plated on polyK-coated glass-bottom dishes, allowed to adhere for 5 min, and then  
410 stimulated with PMA/Iono in RPMI media.

411

#### 412 **Super resolution imaging of nuclear actin**

413 A3.01 T lymphoblastoid cells were washed and adjusted to cell density of 0.35 million  
414 cells/ml a day prior to the experiment, as described above. The next day, 0.6 million cells  
415 were collected/well of a 8-well chambered dish, washed once with PBS and resuspended in of  
416 RPMI (phenolRED free) containing 0.5% FBS. Cells were allowed to adhere for 5 min on  
417 polyK-coated 8-well chamber glass bottom dish. Stimulation was performed by adding 100  $\mu$ l  
418 of PMA/Iono solution dropwise to the cell suspension. Cells were activated for 30s and then  
419 permeabilized and stained with 100 $\mu$ l Perm solution containing 0.3% Triton X-100 +  
420 Phalloidin -Alexa Fluor 488 (1:2000) in 1X cytoskeleton buffer [10 mM MES, 138 mM KCl,  
421 3 mM MgCl, 2 mM EGTA, and 0.32 M sucrose (pH 6.1)] for 30s. Cells were fixed with 1 ml  
422 of 4% methanol-free formaldehyde (Pierce) in 1X cytoskeleton buffer and incubated for 25  
423 min at RT in the dark. Subsequently, the fixed cells were washed twice with cytoskeleton  
424 buffer, blocked with 5% bovine serum albumin (BSA) prepared in 1X cytoskeleton buffer,  
425 and stained with 1:500 Phalloidin atto-647N in 1X cytoskeleton buffer for 1 hour at room  
426 temperature (RT) or overnight (ON) at 4°C. Additionally, to enhance the mCherry signal of

427 the C5/C5L-mCherry expression constructs in the cells, primary antibody staining using anti-  
428 mCherry antibody (1:500) was performed ON in blocking buffer as mentioned above. This  
429 was followed by multiple washing steps in 1X cytoskeleton buffer and staining with  
430 secondary antibody conjugated with an Atto-568 dye, for 1h at RT. Phalloidin atto-647N was  
431 added at this step with the secondary antibody to stain the endogenous nuclear actin filaments,  
432 which were observed in ~40-60% of the cells.

433 STED microscopy was performed on an Expert Line STED system (Abberior Instruments  
434 GmbH, Göttingen, Germany) equipped with an SLM-based easy3D module and an Olympus  
435 IX83 microscope body, using a 100x oil immersion objective (NA, 1.4; Olympus  
436 UPlanSApo). STED images were acquired using the 590 nm (ARPC5/ARPC5L signals) and  
437 640 nm (actin filament signals) excitation laser lines in the line sequential mode with  
438 corresponding 615/20 and 685/70 emission filters placed in front of avalanche photodiodes  
439 for detection. 775 nm STED laser (15% of the maximal power of 3 mW) was used for  
440 depletion with pixel dwell time of 10 to 15  $\mu$ s, 15 nm xy sampling and 9x accumulation. To  
441 increase the signal-to-noise and facilitate subsequent image segmentation and quantification,  
442 STED images were restored with Huygens Deconvolution (Scientific Volume Imaging) using  
443 Classic Maximum Likelihood Estimation (CMLE) algorithm and Deconvolution Express  
444 mode with “Conservative” settings.

445 To segment actin filaments and ARPC5/ARPC5L signals in obtained STED images we  
446 trained a Random Forest classifier using ilastik (ref PMID: 31570887) autocontext workflow  
447 which predicts semantic class attribution (signal or background) for every pixel. The training  
448 set of data was arbitrary selected and very sparsely labelled (<0.1% of total pixels were  
449 manually categorized into “signal” and “background” categories). Obtained machine learning  
450 algorithm was used applied to all acquired images ensuring an unbiased signal segmentation  
451 across all experiments. This allowed the quantification of the number of ARPC5/ARPC5L

452 signals colocalizing with nuclear actin filaments by visual inspection of binary (segmented)  
453 images.

454

#### 455 **Imaging actin dynamics at the Immune synapse post CK-inhibitor treatment**

456 Raji B cells were stained with Cell trace Deep Red (10 $\mu$ M, Thermo Fischer) at 1:1000  
457 dilution for 1h and simultaneously loaded with Staphylococcal enterotoxin E (SEE, Toxin  
458 Technology) at a concentration of 5  $\mu$ g/ml, in RPMI complete media for 30 min at 37°C and  
459 subsequently washed and resuspended in 10% FBS containing RPMI at a concentration of  
460 5x10<sup>4</sup> cells in 100 $\mu$ l. JNLA cells were washed and adjusted a day before as described above.  
461 24h later 1x10<sup>6</sup> were harvested, washed in PBS and resuspended in 100 $\mu$ l RPMI complete  
462 media containing either DMSO or the CK869 for 1h at 37°C. The media is replenished after  
463 1h with fresh media containing either the solvent or the inhibitor such that the cells are at a  
464 final density of 5x10<sup>4</sup> cells in 100 $\mu$ l. 100 $\mu$ l of the treated JNLA cells are plated on a poly-  
465 lysine coated GBDs. Approx. 5-10 regions on the GBDs were selected for live cell imaging  
466 using the spinning disk confocal microscopy as described above. Imaging was started and  
467 100 $\mu$ l Raji B cells were added dropwise onto the T cell suspension while the image  
468 acquisition was ongoing. The following are the acquisition settings for the imaging: exposure  
469 time, 300 ms; frame rate, 6 to 10 frames/s, number of Z planes, 3; Z-stack spacing: 1-1.5 $\mu$ m;  
470 488 nm, laser power 5.5%; and total acquisition time, 30min with acquisition every 30s/XY  
471 position.

472

#### 473 **RNA extraction and Quantitative PCR (qPCR)**

474 For RNA extraction NucleoSpin RNA II kit (Macherey-Nagel) was used. 10x10<sup>6</sup> cells were  
475 collected per condition/per cell line, washed with cold PBS once and their pellets were stored  
476 at -80°C for maximum 2-3weeks. RNA extraction was done following manufacturer's  
477 protocol. After RNA quantification by UV/VIS spectrometry (Nanodrop), between 500ng-

478 1000ng of total RNA was reverse transcribed using the SuperScriptII (Invitrogen) according  
479 to the manufacturers' instructions. 1:10 dilution of the cDNA in RNase free water was used  
480 for qPCR reaction using the SYBR green PCR master mix (Life Technologies), and reactions  
481 were performed on a Quant Studio1 sequence detection system (Applied Biosystems) using  
482 the following program: 50°C for 2 min, 95°C for 10 min, and 40 cycles of 95°C for 15 s and  
483 60°C for 1 min. GAPDH (glyceraldehyde-3-phosphate dehydrogenase) mRNA was used for  
484 normalization of input RNA wherever needed or mentioned. The primers used are available  
485 upon request.

486

#### 487 **Immunoblot analysis**

488 1xE6 cells/condition were collected and lysed in lysis buffer (50 mM Tris-HCl [pH 7.4],  
489 75 mM NaCl, 1 mM EDTA, 1 mM NaF, and 0.5% NP-40) with a freshly added protease  
490 inhibitor cocktail and sodium vanadate and subjected to 9 cycles (30s ON-10s OFF) of  
491 ultrasonication (Bioruptor Plus; Diagenode). The sonicated samples are then spun down, and  
492 the supernatant is collected for protein estimation using the microBCA kit (Pierce). 15-30µg  
493 of protein is then mixed with 6X sample buffer (10% sucrose, 0.1% bromophenol blue, 5 mM  
494 EDTA [pH 8.0], 200 mM Tris [pH 8.8]), and boiled at 95°C for 10min. The lysates are then  
495 run on 12% SDS-PAGE gel and blotted with Trans-blot PVDF membranes (BioRad) for  
496 10min, blocked in 5% BSA in TBS-T and probed with the following primary antibodies:  
497 mouse anti-ARP3, mouse anti-GAPDH, rabbit anti-GAPDH, mouse anti-ARPC5, rabbit anti-  
498 ARPC5L, mouse anti-ARPC1B, rabbit anti-ARPC1A, rabbit anti-ARPC2, mouse anti-  
499 ARPC3, mouse anti-ARPC4 as mentioned in the reagent section. Secondary antibodies  
500 conjugated to HRP were used for enhanced chemiluminescence (ECL)-based detection.

501

502

503

## 504 **Lentivirus production**

505 For small scale production of lentiviral vectors containing shRNA constructs or the pLVX-  
506 expression plasmids,  $3 \times 10^5$  HEK 293T cells were seeded per 6-cm dish (2 ml media per well)  
507 24 h before transfection. Transfection was performed using JetPEI (VWR International) with  
508 1.5  $\mu\text{g}$  of Vector DNA, 1  $\mu\text{g}$  of psPAX2, and 0.5  $\mu\text{g}$  of vesicular stomatitis virus G protein  
509 plasmid (pMD2.G) and 0.2  $\mu\text{g}$  pAdvantage per well of a 6-well. Virus supernatants were  
510 harvested after 48 h, filtered through 0.45- $\mu\text{m}$ -pore-size filters (Roth), and used immediately  
511 for transduction.

512 For the generation of stable T cell lines expressing the C5/C5L-mCherry constructs or  
513 primary human T cells expressing the Lifeact-GFP constructs, five 15 cm petri dishes were  
514 prepared with  $2.5 \times 10^6$  HEK293T cells/dish in 22.5 ml medium. The transduction solution  
515 was prepared in a 50 ml reaction tube, containing: 112.5  $\mu\text{g}$  vector, 40  $\mu\text{g}$  (pMD2.G), 73  $\mu\text{g}$   
516 psPAX2, 25 ml NaCl and 500  $\mu\text{l}$  JetPEI. The transduction solution was mixed and incubated  
517 at RT for 20min. For every dish 5ml of the solution was used. The dishes were incubated for 4  
518 h at 37°C before changing the media. The supernatant containing virus particles was collected  
519 after 48h and filtered via 0.45  $\mu\text{m}$  filter (Roth/Millipore). Virus was concentrated using 20%  
520 sucrose and ultracentrifugation at 24,000 rpm (Beckman SW28 rotor) for 2h at 4 °C. The  
521 supernatant was discarded and 200  $\mu\text{l}$  fresh FCS free RPMI medium were added on the virus  
522 pellet and incubated for 30 min at 4 °C. The pellet was resuspended and stored at -80°C or  
523 directly used for transduction. Virus titers were assessed by determination of reverse  
524 transcriptase activity (SG-PERT).

525

## 526 **Transduction of human T cells**

527  $2-3 \times 10^6$  JNLA or A3.01 cells were resuspended in  $1.5 \times 10^{11}$  puRT/  $\mu\text{l}$  concentrated virus  
528 solution or 1 ml of non-concentrated virus supernatant followed spin-transduction in 24-well  
529 plate format at 2300 rpm, for 1.5 h at 37°C, RT. After transduction the cells were incubated at

530 37 °C, overnight. The next day the cells were transferred into a 12-well plate and 3 ml  
531 complemented RPMI medium was added and incubated overnight. Cells expressing shRNAs  
532 or the C5/C5L-mCherry constructs were transferred to fresh medium 24h post transduction.  
533 48h later puromycin (1.5µg/ml) was added and 72h post transduction, the medium was  
534 changed to fresh media with puromycin to accelerate cell growth. On day 4 post transduction,  
535 the cells were adjusted to the densities required according to the experimental question being  
536 addressed, with RPMI media without any selection antibiotics. Knock down was stable in the  
537 bulk culture for up to ~1week post transduction. To generate stable A301 cells expressing  
538 either C5 or C5L tagged with N-terminal mCherry, the cells were FACS sorted for mCherry  
539 expressing cells post selection with puromycin for 1 week and then expanded in culture.

540

#### 541 **Immunofluorescence Microscopy**

542 As described previously [7], to study the actin dynamics in JNLA cells activated on  
543 stimulatory coverslips, 1-2x 10<sup>5</sup> cells are put on the stimulatory coverslips for 5min at 37°C  
544 before fixing them with 3% PFA. Following permeabilization and blocking, coverslips are  
545 incubated with primary antibodies overnight at 4°C in 1% BSA(PBS). For phospho-specific  
546 targets/antibodies, all steps were done in 1X TBS. Following dilutions are used for the  
547 primary antibodies: rabbit anti-pTyr (1:100), rabbit anti-pSLP76 (1:1000) and mouse anti-  
548 mCherry (1:500). Species specific secondary antibodies conjugated to Alexa-Fluor 568/647  
549 (1:1000) were used for along with Phalloidin-Alexa Fluor 488 (1:600) for staining the F-actin.  
550 Coverslips were mounted with Mowiol (Merck Millipore) and analyzed by either  
551 epifluorescence microscopy (IX81 SIF-3 microscope and Xcellence Pro software; Olympus)  
552 or confocal microscopy (TCS SP8 microscope and LAS X software; Leica).

553

554

555

556 **Generation of CRISPR-Cas9 based Knockout cells**

557 We designed two-three guideRNAs for knocking out each of the genes, ARPC5 and  
558 ARPC5L, respectively, with the help of Synthego's CRISPR design tool  
559 (<https://design.synthego.com/#/>). The guideRNAs were premixed with Cas9.3NLS (IDT) to  
560 create ribonucleoprotein complexes (RNPs) for faster and better editing efficiency as  
561 described earlier [27]. Premixed RNPs were then nucleofected (Nucleofector 4D, Lonza) into  
562 either the JNLA cells or primary CD4 T cells (human). JNLA cells post nucleofection are  
563 maintained in RPMI containing 10% FBS as a heterogenous pool, followed by knockout (KO)  
564 validation in the bulk pool using immunoblotting or flow cytometry.

565

566 **Nuclear and cytoplasmic biochemical fractionation**

567 JNLA cells were fractionated using the REAP method as described in [28].  $8 \times 10^6$  cells were  
568 harvested for each condition. The only difference we adapted is the manual sonication instead  
569 of an automated one. The number of sonication cycle varies between 10-15 (60s ON, 10s  
570 OFF) with the manual sonicator at 4°C or with ice. Each of the nuclear, cytoplasmic and total  
571 cell fractions are then immunoblotted as described above. As and when necessary,  
572 immunoblots were often stripped in 1X stripping buffer, followed by blocking for 1h at RT  
573 and re-probing with primary antibodies ON at 4°C. The protocol we followed for stripping  
574 including the preparation of stripping buffer were adapted from Abcam's published protocol  
575 online (<https://www.abcam.com/ps/pdf/protocols/stripping%20for%20reprobing.pdf>).

576

577

578

579



580 **Supplemental information**

581 **Supplementary Videos**

582 **Suppl. Video 1: Live NFA and AR formation in DMSO treated Jurkat CD4 T cells upon falling**  
583 **on a stimulatory surface.**

584 **Suppl. Video 2: Live NFA and AR formation in CK869 treated Jurkat CD4 T cells upon falling**  
585 **on a stimulatory surface.**

586 **Suppl. Video 3: Live imaging of an IS formation between DMSO treated JNLA (in grey) and**  
587 **SEE treated B cells (in magenta).**

588 **Suppl. Video 4: Live imaging of an IS formation between CK869 treated JNLA (in grey) and**  
589 **SEE treated B cells (in magenta).**

590

591 **Supplementary Figures**

592 **Suppl. Fig 1: Gene expression profile of Arp2/3 complex subunits in CD4 T cells**

593 (A) mRNA expression of all the subunits of the Arp2/3 complex along with the isoforms of ARPC1  
594 and ARPC5 across Jurkat cell line and primary human CD4 T cells were additionally verified. The  
595 heatmap shows the mRNA expression levels of each of the human ARP2/3 complex subunits and their  
596 isoforms, as analyzed by the Ct mean values using qRT-PCR. Color code for the heatmap: dark (high  
597 expression) and white (low expression). D1-D5 indicates CD4 T cells isolated from five different  
598 healthy human donors. Comparison of gene expression between RNA isolated from naïve CD4 T cells  
599 (denoted as Resting) and from the CD4s that post activated for 72h with Dynabeads (denoted here as  
600 Activated 'A').

601

602 **Suppl. Fig 2: ARPC5 knockdown cells exhibit filopodia and lamellipodia like extensions upon**  
603 **TCR activation.**

604 (A) Representative bigger field of view of single plane immunofluorescence images showing  
605 Phalloidin-488 stained F-actin ring (AR) formation in JNLA.GFP cells, treated with indicated shRNA  
606 upon activation on coverslips coated with antiCD3+CD28 antibodies. Scale bar, 10µm.

607 **(B)** Representative confocal still images (maximum projection) of JNLA.GFP cells upon activation for  
608 5min on stimulatory coverslip leads to formation of distinct morphologies of actin ring formation and  
609 cell spreading. Cells were fixed, permeabilized and stained for F-actin (with Phalloidin 488) and  
610 counterstained with Dapi. **(C-D)** Cells with knockdown, exhibiting different morphologies (bars in  
611 different colors, stacked) as classified above in (B), upon TCR activation, were quantified as % of  
612 cells of the total 100 cells/condition is represented in (C). **(D)** shows the fold change in the different  
613 morphotypes exhibited by the cells upon knockdown relative to the control cells. Scale bar, 10 $\mu$ m.  
614 **(E)** Representative still images from live cell spinning disk acquisition of JNLA.GFP cells with  
615 control and C5/C5L knockdown, upon falling on stimulatory GBDs, form NFA and AR. Movies were  
616 acquired for at a frame interval of 30s for a total of 10min after the T cells were added dropwise. Two  
617 timepoints representing early activation-NFA formation and a later timepoint showing AR formation  
618 for each condition has been shown. Arrows (in white) points at the NFA whereas arrowheads (in  
619 white) point at the AR formation as it starts forming (top panel) or has fully formed into a classical  
620 actin ring structure (bottom). Scale bar, 7 $\mu$ m **(F)** Fold change was calculated for frequency of NFA  
621 (black bars) and AR formation (grey bars) for C5/C5L knockdown relative to control samples upon  
622 TCR activation on stimulatory surface. At least 30cells/condition/experiment were analyzed. Bar  
623 graph shows the mean of two independent experiments with dots representing each experiment.

624

625 **Suppl. Fig 3: Rescue of the NFA and AR upon overexpression of the ARPC5 isoforms in JNLA**  
626 **Knockout cells.**

627 **(A)** Representative immunoblots show levels of each of the ARP2/3 complex subunits in JNLA.GFP  
628 cells with the indicated knockout (KO) of each of the ARPC5 isoforms. Black arrowheads indicate the  
629 specific bands, black asterisks mark unspecific bands. Note that the ARPC5L antibody also detects  
630 ARPC5 (marked by red asterisk). Immunoblots are representative of three independent experiments.  
631 **(B-C)** Shown are representative immunoblots confirming the successful overexpression of each of the  
632 ARPC5 isoforms in JNLA.GFP cells with the indicated knockout (KO) of each of the ARPC5  
633 isoforms compared to the nontargeting control (NTC) cells.

634

635 **Suppl. Fig 4: ARPC5 KO impacts the proximal TCR activation via Tyr and SLP-76.**

636 **(A,D)** Representative confocal images of JNLA.GFP cells with indicated knockout or control (NTC),  
637 upon 5min of activation on coverslips coated with anti-CD3+CD28 antibodies. Cells were fixed and  
638 stained for F-actin (with Phalloidin 488) and pTyr or pSLP-76 (AlexaFluor 647), respectively. **(B,E)**  
639 shows quantification of the total number of pTyr or pSLP-76 clusters/cell in KO relative to control  
640 cells analysed using the 'Spot Detector' Fiji plugin. **(C,F)** Dot plots represent the changes in overall  
641 intensity of pTyr or pSLP-76 clusters per cell where each dot represents intensity of clusters/cell  
642 analysed. Error bars were calculated from meanSD of 3 independent experiments where ~80-100 cells  
643 were analyzed per condition. One sample t-test was used to determine statistical significances, where  
644 \* $P \leq 0.033$ , \*\* $P \leq 0.0021$ , \*\*\* $P \leq 0.0002$  and ns: not significant. Scale bar, 7 $\mu$ m. **(D)** Subcellular  
645 distribution of the ARPC5 subunit and its isoform ARPC5L was determined by performing a  
646 biochemical fractionation of JNLA CD4 T cells. Representative immunoblots reveal levels of ARPC5  
647 isoforms along with ARP3 in the whole cell extract (WCE), cytoplasmic (C) and nuclear (N) fractions  
648 in the indicated JNLA.GFP knockout cells post fractionation. Arp3 was used as an additional reference  
649 for the Arp2/3 complex. **(E)** The dot plot shows frequency of colocalization of ARPC5 and ARPC5L  
650 with nuclear F-actin (from representative STED- super resolved images shown in Fig3D) in A3.01  
651 cells post 30s of stimulation with PMA+Ionomycin. Each dot represents colocalization events per cell  
652 that was analysed.

653

654 **Suppl. Fig 5: APH mediated vs P/I mediated NFA burst in CD4 T cells.**

655 **(A)** Representative immunoblots shows induction of phospho levels of DNA damage sensor CHK-1 in  
656 JNLA.GFP cells upon replication stress induction by Aphidicolin (15 $\mu$ M, APH) for 3h. Membranes  
657 were first probed with phospho specific antibodies, followed by stripping and re-probing with  
658 antibodies against total protein and GAPDH. Immunoblots are representative of three independent  
659 experiments. **(B)** Single cell tracking of 10 cells per condition (denoted by different colors for NTC,  
660 C5 or C5L KO) for the entire timeframe of 5h post pre-treatment with APH, shows the APH mediated  
661 NFA kinetics in KO and control JNLA cells. **(C)** shows relative comparison (Fold change, FC) of cells  
662 forming either NFA or AR, respectively, in Control and KO JNLA cells upon two different modes of

663 T cell activation i.e., activation with PMA+Ionomycin (P/I) or on anti CD3/28 coated coverslips. Bars  
664 represent mean values from three independent experiments and error bars were calculated from  
665 mean $\pm$ SD of 3 independent experiments where at least 30 cells were analyzed per condition per  
666 experiment for NFA quantification and more than 100 cells per condition per experiment were  
667 analyzed for AR quantification. **(D)** Blocking of the calcium signalling pathway downstream of  
668 Calmodulin, using inhibitors STO609, KN93 and KN62, respectively on JNLA cells, followed by  
669 induction of replication stress with APH does not impair the replication stress mediated NFA bursts.  
670 30 cells/ condition were analyzed. Statistical significance was calculated using One-way ANOVA  
671 (multiple comparison) or Welch's t-test according to the experimental setup. \* $P \leq 0.0332$ , \*\* $P \leq$   
672  $0.0021$ , \*\*\* $P \leq 0.0002$ , \*\*\*\* $P \leq 0.000021$  and ns: not significant.

673  
674

## 675 **References**

- 676 1. Schrank, B.R., Aparicio, T., Li, Y., Chang, W., Chait, B.T., Gundersen, G.G.,  
677 Gottesman, M.E., and Gautier, J. (2018). Nuclear ARP2/3 drives DNA break clustering for  
678 homology-directed repair. *Nature* 559, 61-66.
- 679 2. Caridi, C.P., D'Agostino, C., Ryu, T., Zapotoczny, G., Delabaere, L., Li, X.,  
680 Khodaverdian, V.Y., Amaral, N., Lin, E., Rau, A.R., et al. (2018). Nuclear F-actin and  
681 myosins drive relocalization of heterochromatic breaks. *Nature* 559, 54-60.
- 682 3. Caridi, C.P., Plessner, M., Grosse, R., and Chiolo, I. (2019). Nuclear actin filaments in  
683 DNA repair dynamics. *Nat Cell Biol* 21, 1068-1077.
- 684 4. Lamm, N., Read, M.N., Nobis, M., Van Ly, D., Page, S.G., Masamsetti, V.P.,  
685 Timpson, P., Biro, M., and Cesare, A.J. (2020). Nuclear F-actin counteracts nuclear  
686 deformation and promotes fork repair during replication stress. *Nat Cell Biol* 22, 1460-1470.
- 687 5. Pinzaru, A.M., Kareh, M., Lamm, N., Lazzerini-Denchi, E., Cesare, A.J., and Sfeir, A.  
688 (2020). Replication stress conferred by POT1 dysfunction promotes telomere relocalization to  
689 the nuclear pore. *Genes Dev* 34, 1619-1636.
- 690 6. Baarlink, C., Wang, H., and Grosse, R. (2013). Nuclear actin network assembly by  
691 formins regulates the SRF coactivator MAL. *Science* 340, 864-867.
- 692 7. Tsooulidis, N., Kaw, S., Laketa, V., Kutscheidt, S., Baarlink, C., Stolp, B., Grosse,  
693 R., and Fackler, O.T. (2019). T cell receptor-triggered nuclear actin network formation drives  
694 CD4(+) T cell effector functions. *Sci Immunol* 4.

- 695 8. Valitutti, S., Dessing, M., Aktories, K., Gallati, H., and Lanzavecchia, A. (1995).  
696 Sustained signaling leading to T cell activation results from prolonged T cell receptor  
697 occupancy. Role of T cell actin cytoskeleton. *J Exp Med* *181*, 577-584.
- 698 9. Sedwick, C.E., Morgan, M.M., Jusino, L., Cannon, J.L., Miller, J., and Burkhardt, J.K.  
699 (1999). TCR, LFA-1, and CD28 play unique and complementary roles in signaling T cell  
700 cytoskeletal reorganization. *J Immunol* *162*, 1367-1375.
- 701 10. Acuto, O., and Cantrell, D. (2000). T cell activation and the cytoskeleton. *Annu Rev*  
702 *Immunol* *18*, 165-184.
- 703 11. Reicher, B., and Barda-Saad, M. (2010). Multiple pathways leading from the T-cell  
704 antigen receptor to the actin cytoskeleton network. *FEBS Lett* *584*, 4858-4864.
- 705 12. Millard, T.H., Behrendt, B., Launay, S., Futterer, K., and Machesky, L.M. (2003).  
706 Identification and characterisation of a novel human isoform of Arp2/3 complex subunit p16-  
707 ARC/ARPC5. *Cell Motil Cytoskeleton* *54*, 81-90.
- 708 13. Galloni, C., Carra, D., Abella, J.V.G., Kjær, S., Singaravelu, P., Barry, D.J., Kogata,  
709 N., Guérin, C., Blanchoin, L., and Way, M. (2021). MICAL2 enhances branched actin  
710 network disassembly by oxidizing Arp3B-containing Arp2/3 complexes. *J Cell Biol* *220*.
- 711 14. Abella, J.V., Galloni, C., Pernier, J., Barry, D.J., Kjær, S., Carlier, M.F., and Way, M.  
712 (2016). Isoform diversity in the Arp2/3 complex determines actin filament dynamics. *Nat Cell*  
713 *Biol* *18*, 76-86.
- 714 15. von Loeffelholz, O., Purkiss, A., Cao, L., Kjaer, S., Kogata, N., Romet-Lemonne, G.,  
715 Way, M., and Moores, C.A. (2020). Cryo-EM of human Arp2/3 complexes provides structural  
716 insights into actin nucleation modulation by ARPC5 isoforms. *Biol Open* *9*.
- 717 16. Fäßler, F., Dimchev, G., Hodirnau, V.V., Wan, W., and Schur, F.K.M. (2020). Cryo-  
718 electron tomography structure of Arp2/3 complex in cells reveals new insights into the branch  
719 junction. *Nat Commun* *11*, 6437.
- 720 17. Pizarro-Cerda, J., Chorev, D.S., Geiger, B., and Cossart, P. (2017). The Diverse  
721 Family of Arp2/3 Complexes. *Trends Cell Biol* *27*, 93-100.
- 722 18. Monks, C.R., Freiberg, B.A., Kupfer, H., Sciaky, N., and Kupfer, A. (1998). Three-  
723 dimensional segregation of supramolecular activation clusters in T cells. *Nature* *395*, 82-86.
- 724 19. Grakoui, A., Bromley, S.K., Sumen, C., Davis, M.M., Shaw, A.S., Allen, P.M., and  
725 Dustin, M.L. (1999). The immunological synapse: a molecular machine controlling T cell  
726 activation. *Science* *285*, 221-227.

- 727 20. Campi, G., Varma, R., and Dustin, M.L. (2005). Actin and agonist MHC-peptide  
728 complex-dependent T cell receptor microclusters as scaffolds for signaling. *J Exp Med* 202,  
729 1031-1036.
- 730 21. Dustin, M.L., Tseng, S.Y., Varma, R., and Campi, G. (2006). T cell-dendritic cell  
731 immunological synapses. *Curr Opin Immunol* 18, 512-516.
- 732 22. Varma, R., Campi, G., Yokosuka, T., Saito, T., and Dustin, M.L. (2006). T cell  
733 receptor-proximal signals are sustained in peripheral microclusters and terminated in the  
734 central supramolecular activation cluster. *Immunity* 25, 117-127.
- 735 23. Monaco, S., Jahraus, B., Samstag, Y., and Bading, H. (2016). Nuclear calcium is  
736 required for human T cell activation. *J Cell Biol* 215, 231-243.
- 737 24. Le Clainche, C., Schlaepfer, D., Ferrari, A., Klingauf, M., Grohmanova, K.,  
738 Veligodskiy, A., Didry, D., Le, D., Egile, C., Carlier, M.F., et al. (2007). IQGAP1 stimulates  
739 actin assembly through the N-WASP-Arp2/3 pathway. *J Biol Chem* 282, 426-435.
- 740 25. Suzuki, T., Mimuro, H., Suetsugu, S., Miki, H., Takenawa, T., and Sasakawa, C.  
741 (2002). Neural Wiskott-Aldrich syndrome protein (N-WASP) is the specific ligand for  
742 *Shigella* VirG among the WASP family and determines the host cell type allowing actin-  
743 based spreading. *Cell Microbiol* 4, 223-233.
- 744 26. Miki, H., Miura, K., and Takenawa, T. (1996). N-WASP, a novel actin-  
745 depolymerizing protein, regulates the cortical cytoskeletal rearrangement in a PIP2-dependent  
746 manner downstream of tyrosine kinases. *Embo j* 15, 5326-5335.
- 747 27. Albanese, M., Ruhle, A., Mittermaier, J., Mejías-Pérez, E., Gapp, M., Linder, A.,  
748 Schmacke, N.A., Hofmann, K., Hennrich, A.A., Levy, D.N., et al. (2022). Rapid, efficient and  
749 activation-neutral gene editing of polyclonal primary human resting CD4(+) T cells allows  
750 complex functional analyses. *Nat Methods* 19, 81-89.
- 751 28. Suzuki, K., Bose, P., Leong-Quong, R.Y., Fujita, D.J., and Riabowol, K. (2010).  
752 REAP: A two minute cell fractionation method. *BMC Res Notes* 3, 294.
- 753

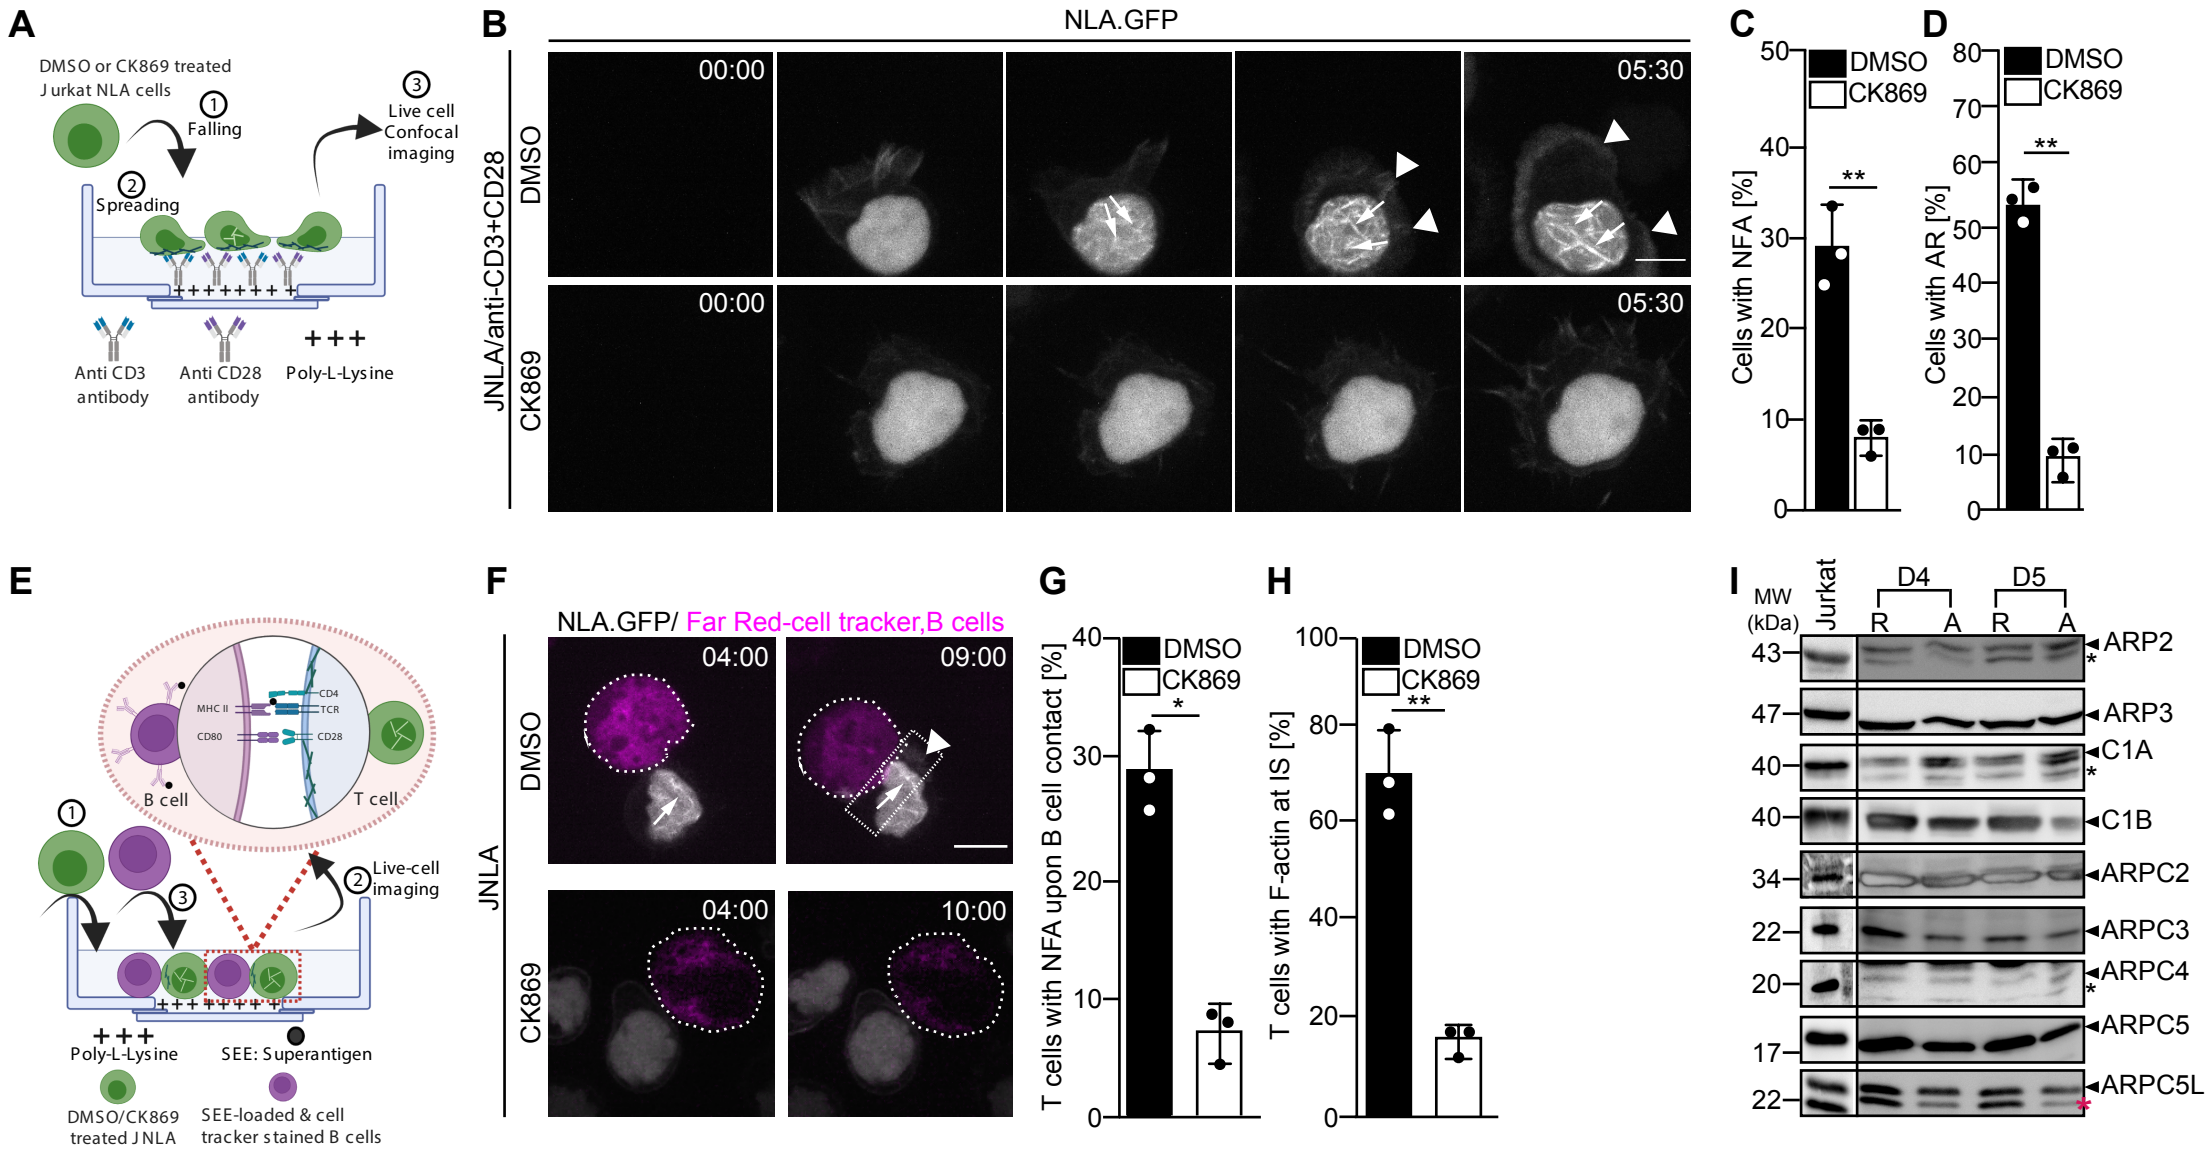

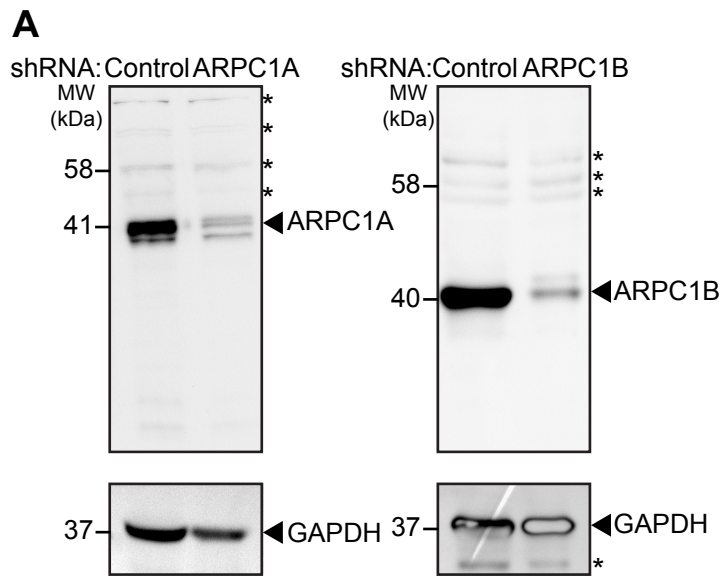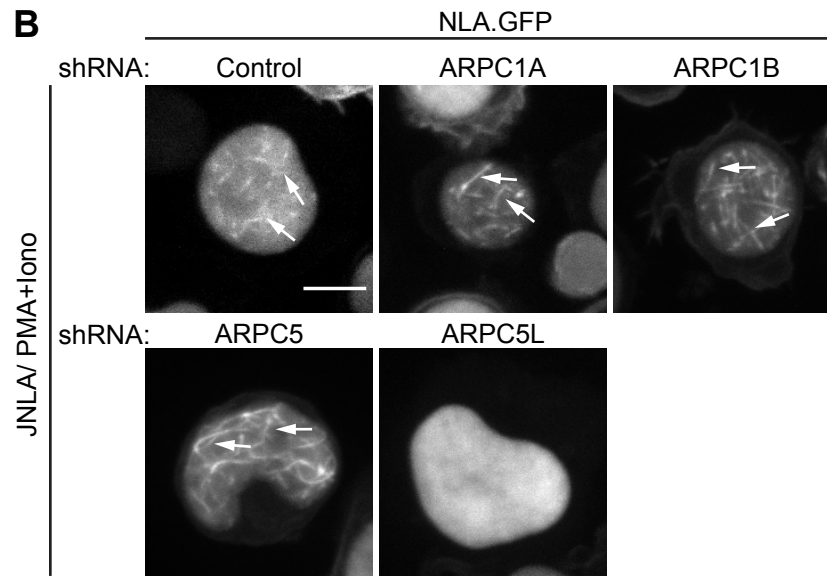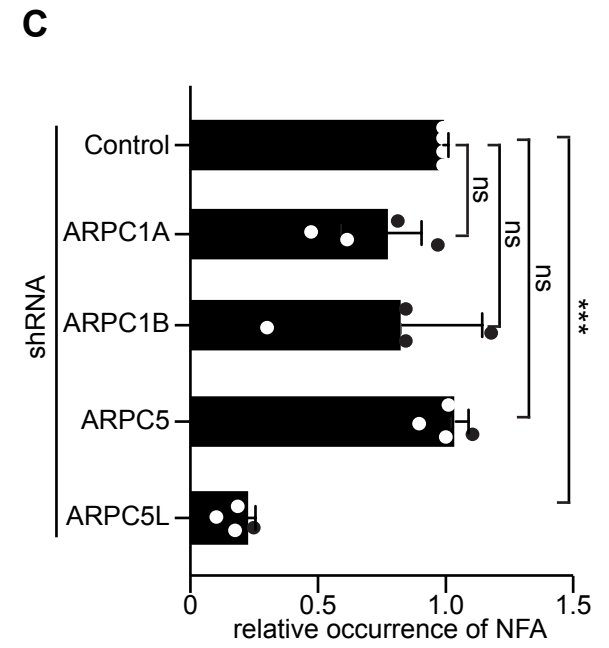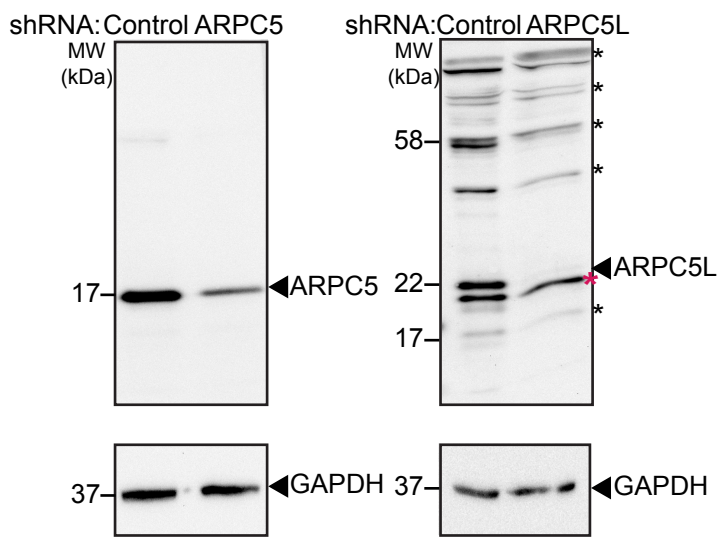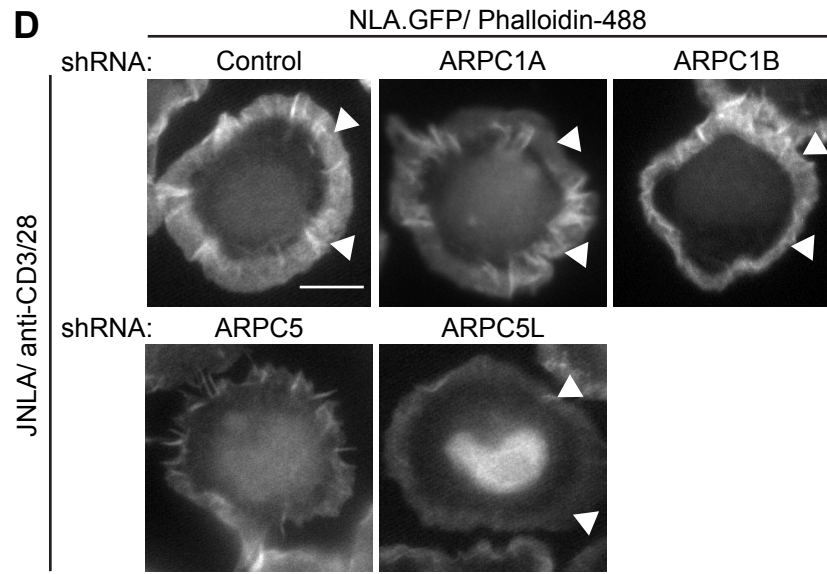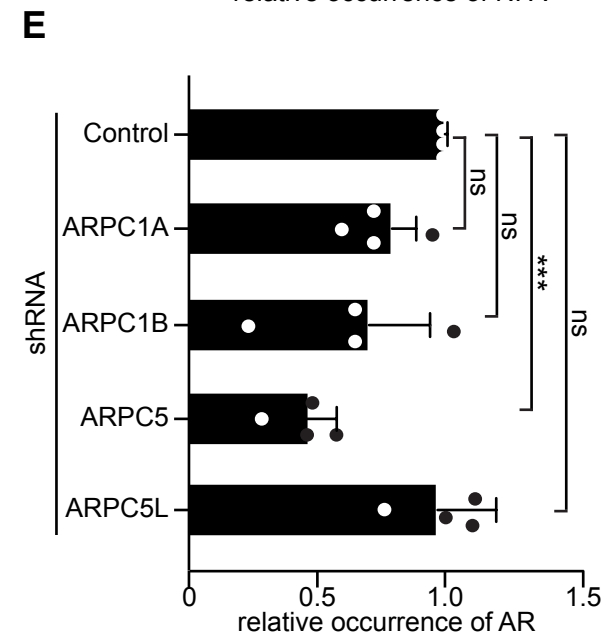



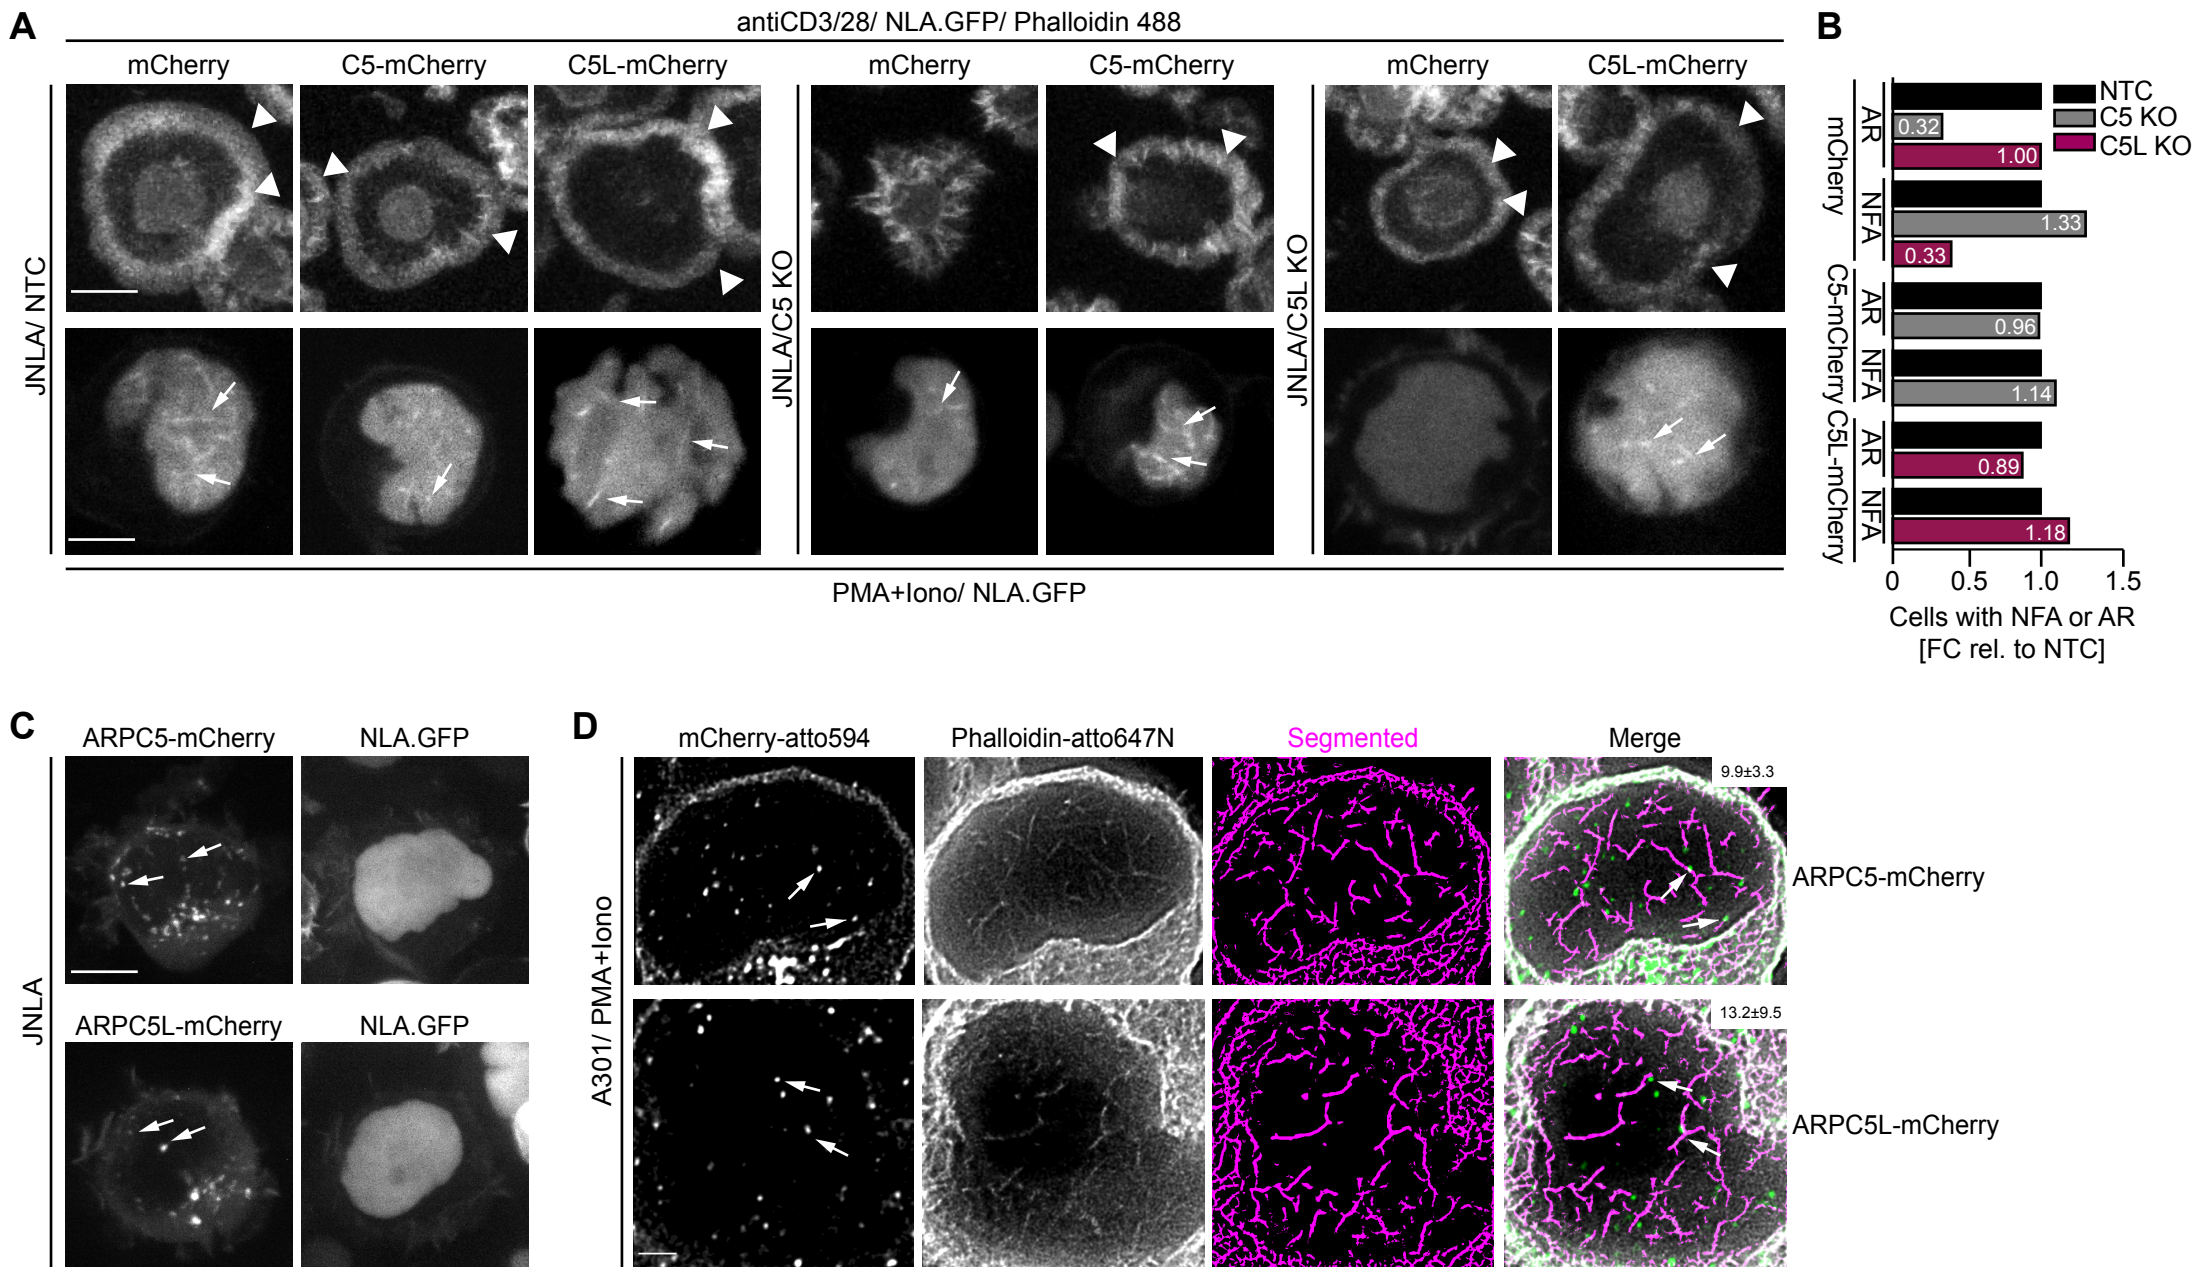

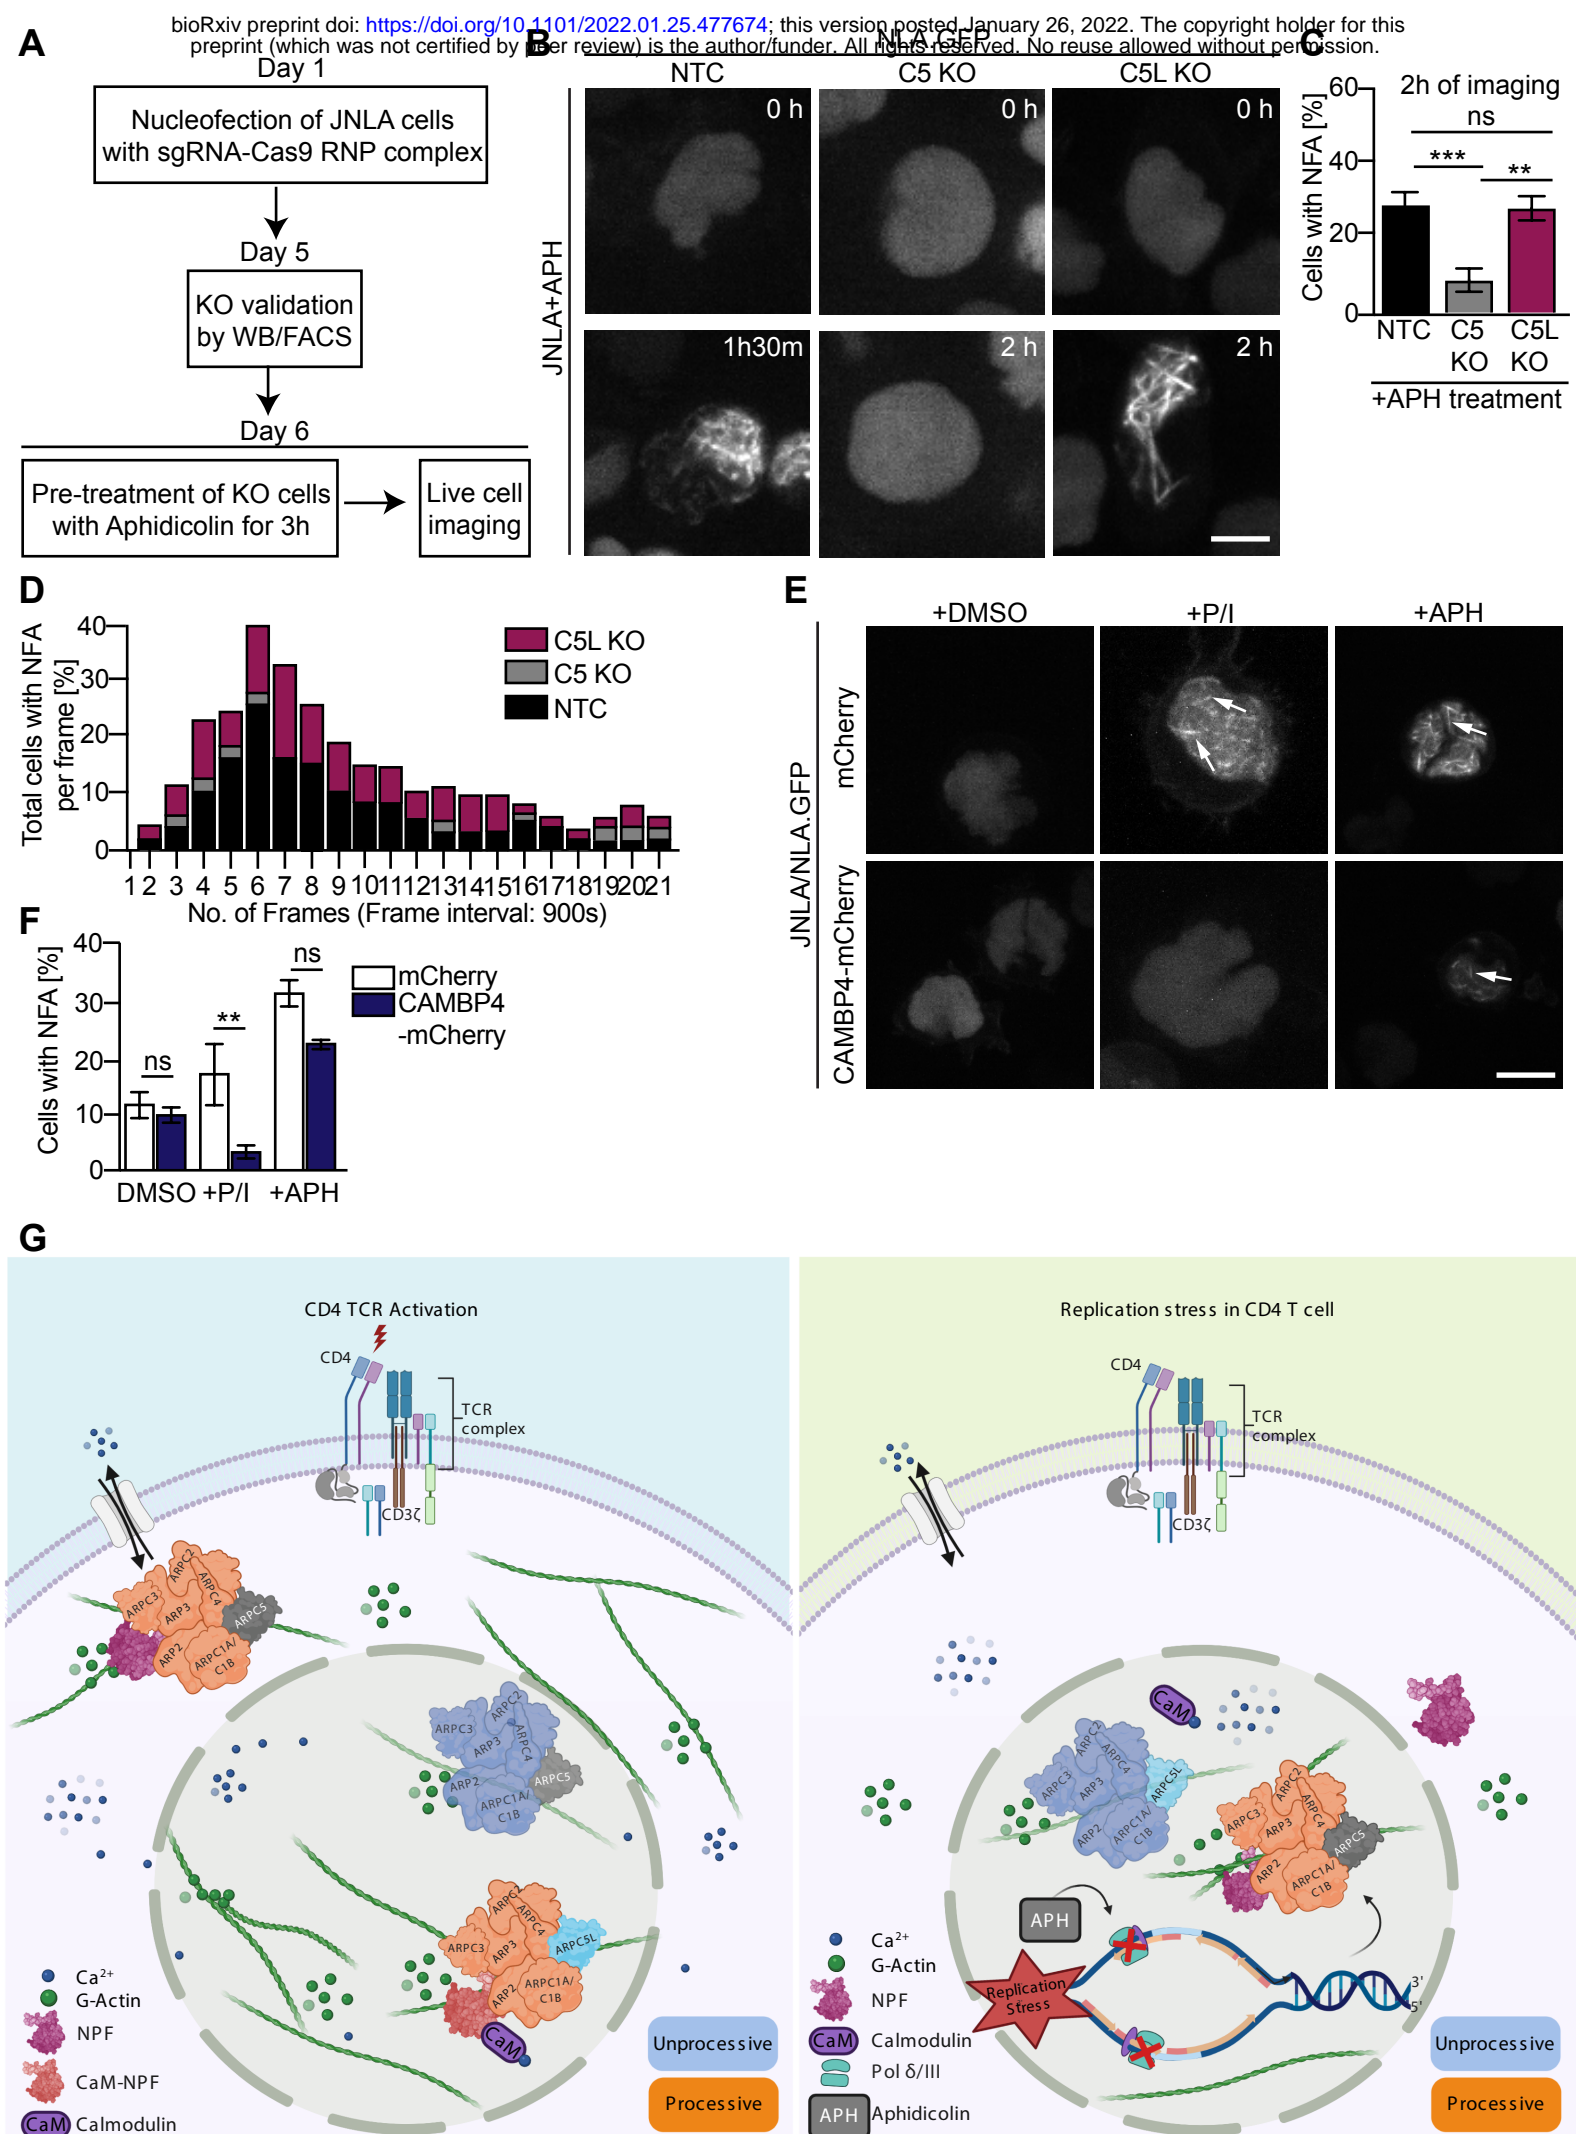

**A**

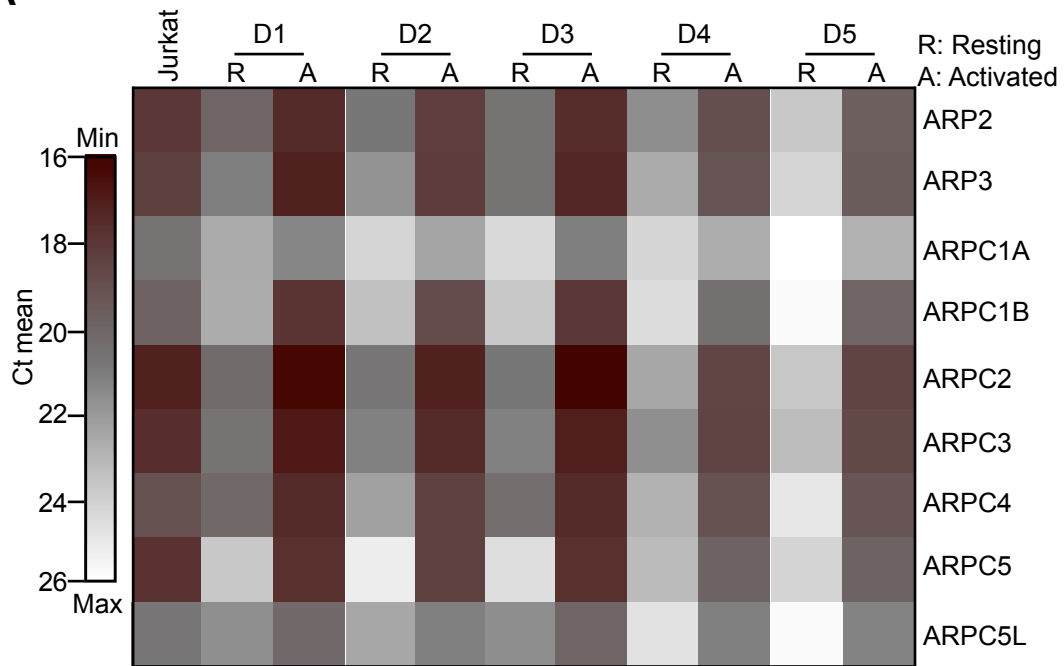

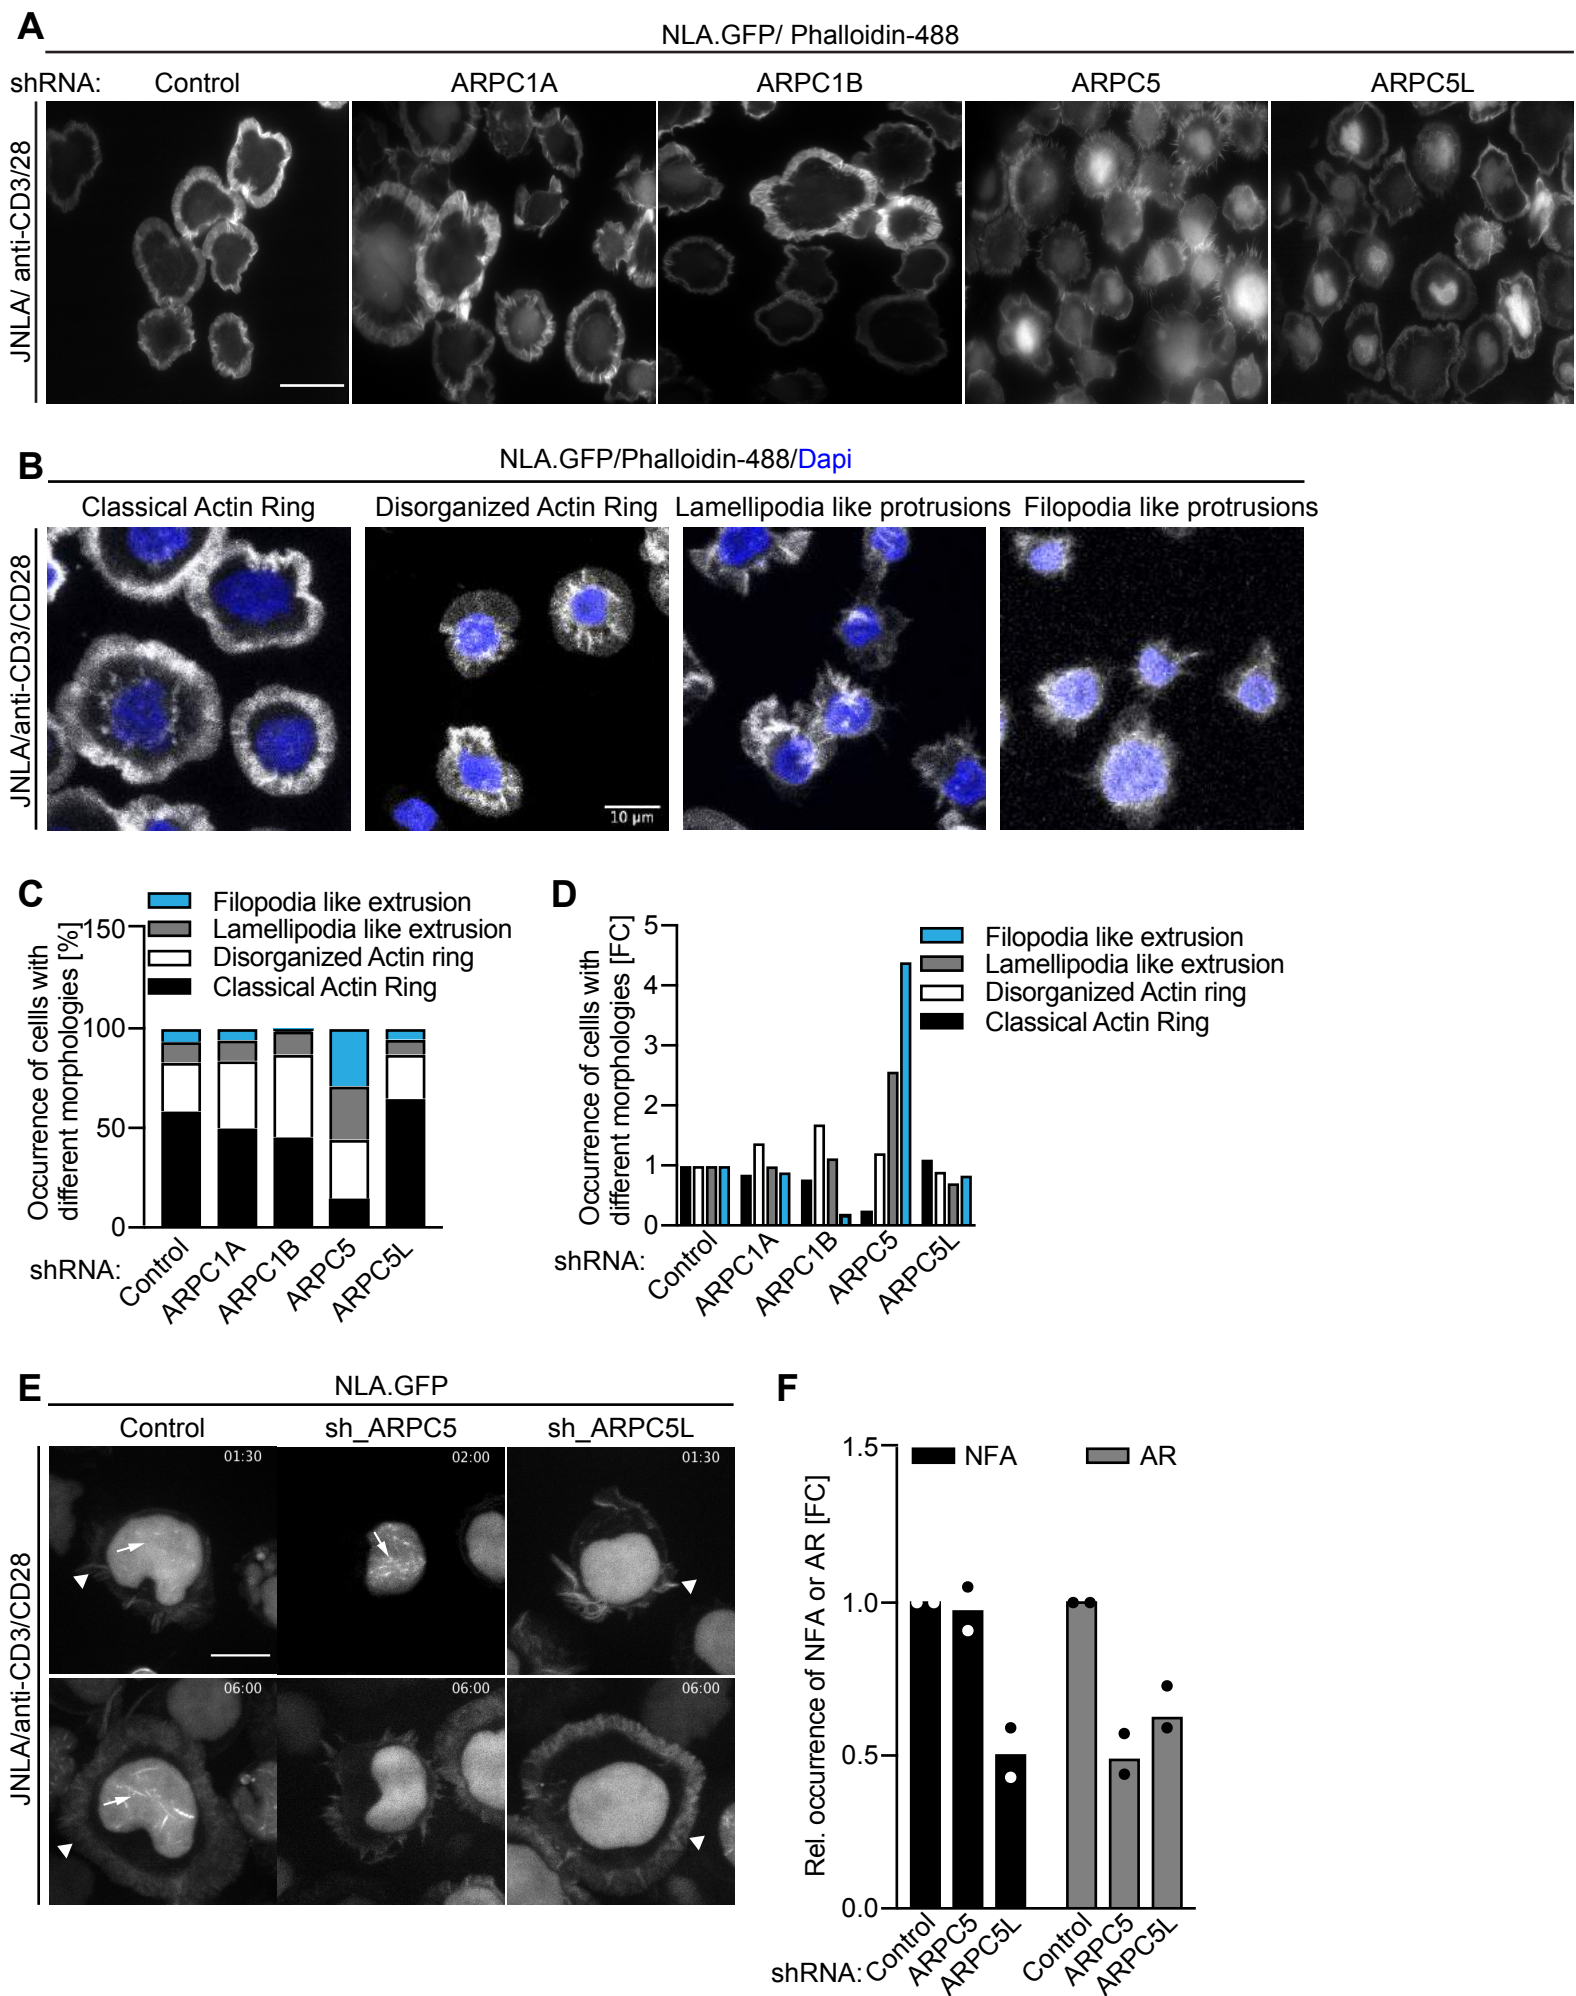

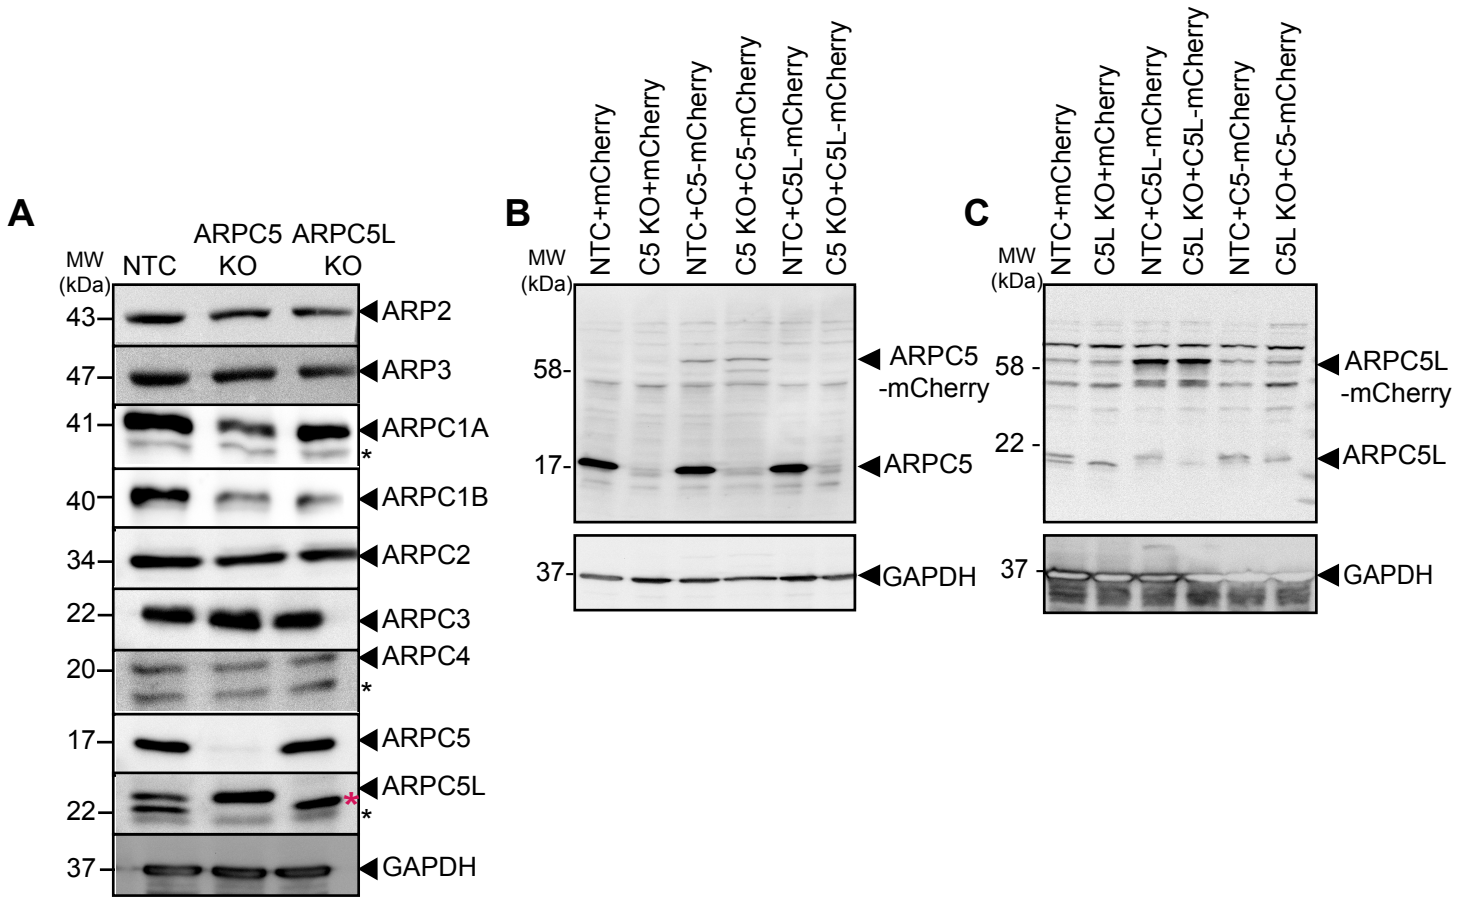

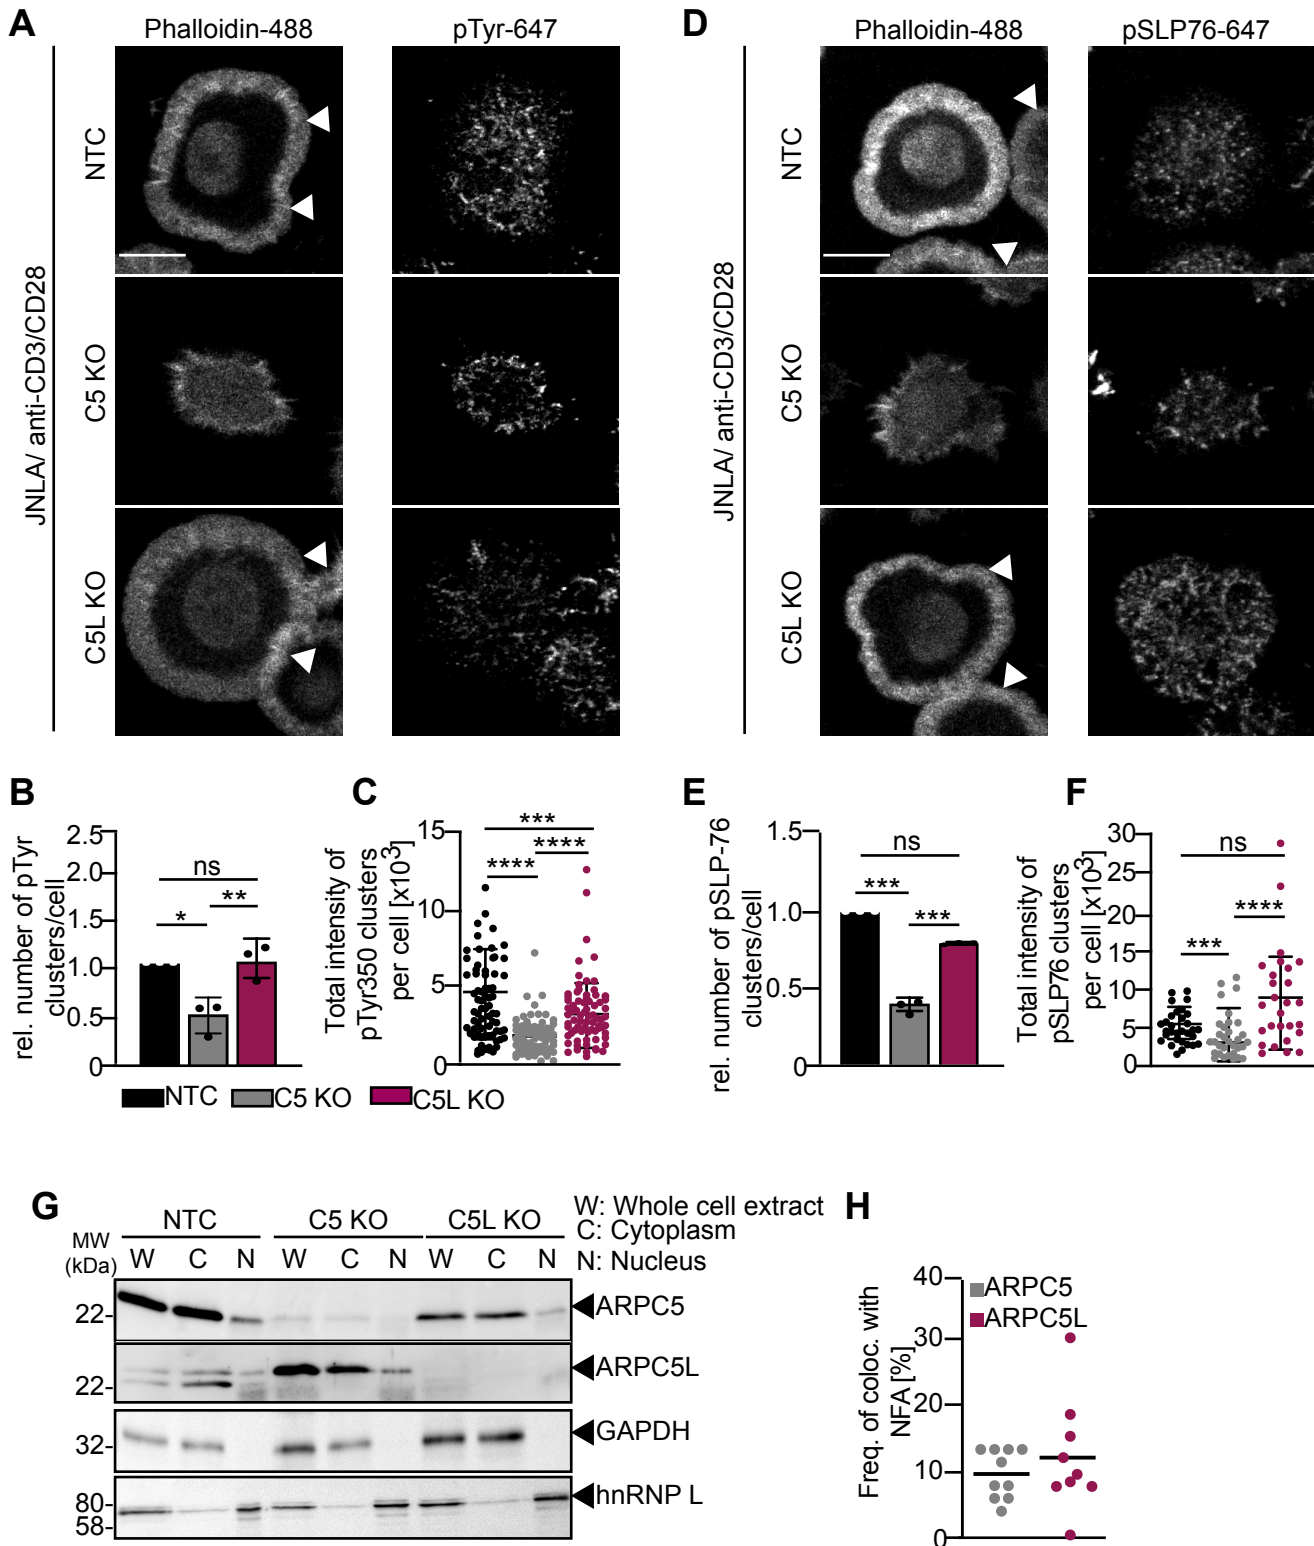

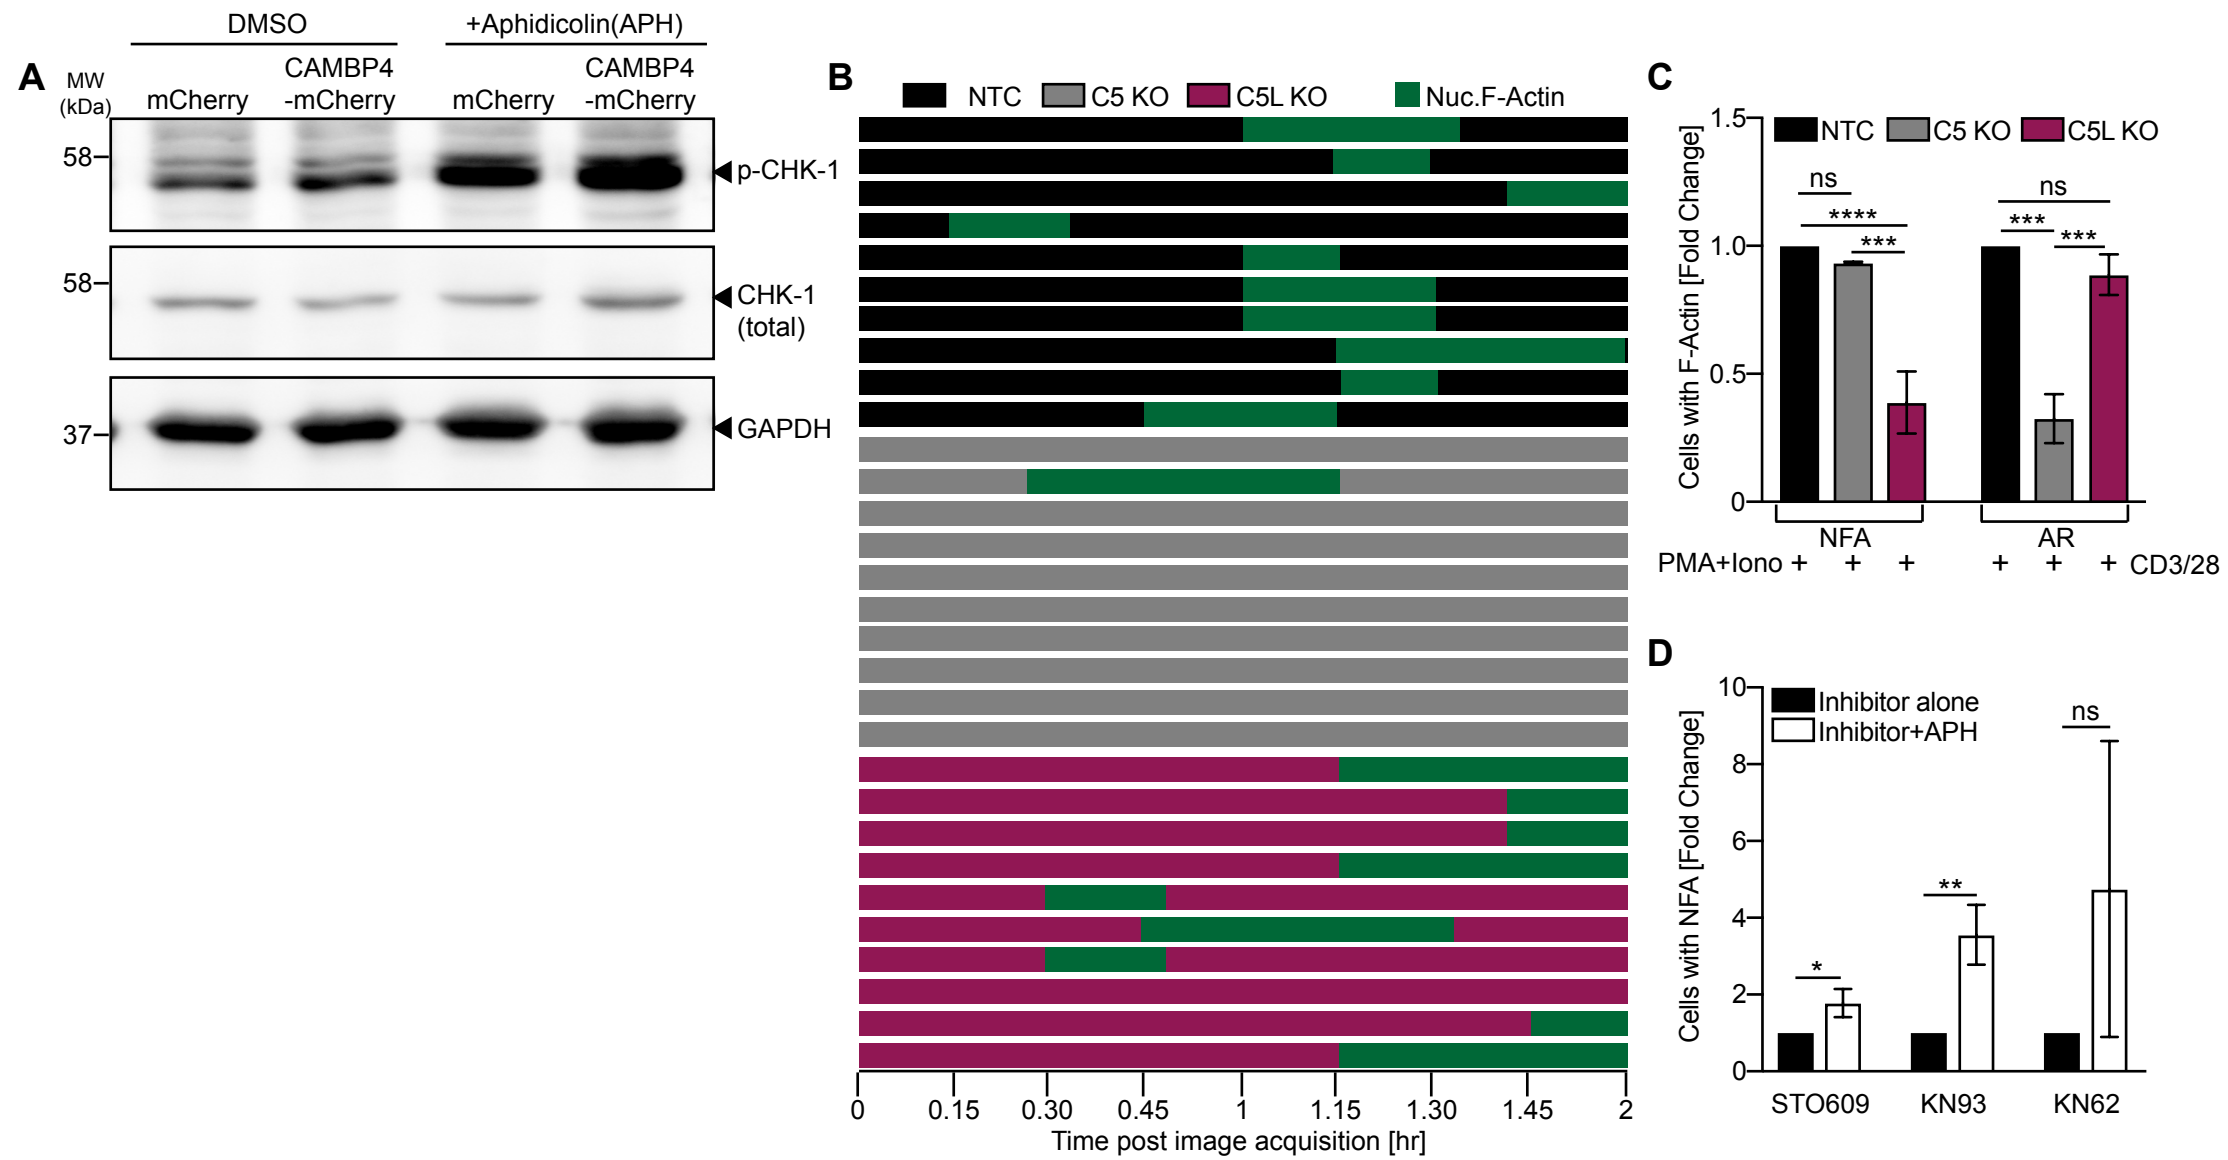

Source: http://biorxiv.org/content/10.1101/2022.01.25.477674v1.full.pdf
